# Supplementary material for: Glucosamine functionalized gold nanoparticles for the specific detection and colorimetric assay of glutathione in real samples
Source: Royal Society of Chemistry journal article supplement (doi:10.1039/d4nj02620a), 2024-01-01
Supplement: d4nj02620a1.pdf [file d4nj02620a1.pdf]

## Electronic Supplementary information

### Glucosamine functionalized gold nanoparticles for specific detection and colorimetric assay of Glutathione from real samples

Anurag Kumar Singh<sup>a</sup>, Saumya Singh<sup>a</sup>, Raksha Singh<sup>a</sup>, Manish Sharma<sup>b</sup>, Ida Tiwari<sup>a</sup> and K. K. Upadhyay<sup>a\*</sup>

\*Corresponding Author

<sup>a</sup>Department of chemistry (Centre of Advanced Study), Institute of Science, Banaras Hindu University, Varanasi-221005, India.

<sup>b</sup>Defence Institute of Physiology and Allied Sciences (DIPAS), DRDO, Lucknow Road, Timarpur, Delhi 110054, India.

Email: [drkaushalbhu@yahoo.co.in](mailto:drkaushalbhu@yahoo.co.in)

#### Table of content

| S. No. | Fig. No. | Content                                                                                                                                                                                    | Page No. |
|--------|----------|--------------------------------------------------------------------------------------------------------------------------------------------------------------------------------------------|----------|
| 1.     | Fig.S1   | (a) Visual response of GNPs synthesised using different concentrations of glucosamine (1mM, 2Mm, 4mM, 6mM) keeping other reaction parameters constant (b) Corresponding UV-Visible spectra | 4        |
| 2.     | Fig.S2   | (a) Visual response of GNPs with varying reaction time (1/2, 1, 1.5, 2, 3 hr) (b) Corresponding UV-Visible spectra                                                                         | 4        |
| 3.     | Fig.S3   | (a) Visual response of GNPs with varying reaction temperature (40, 50, 60, 70 and 80) (b) Corresponding UV-Visible spectra                                                                 | 5        |
| 4.     | Fig.S4   | Comparison between controlled preparations and GNPs                                                                                                                                        | 6        |
| 5.     | Fig.S5   | UV-Visible spectra of various controlled preparation and GNPs                                                                                                                              | 6        |
| 6.     | Fig.S6   | Image showing Tyndell effect                                                                                                                                                               | 7        |
| 7.     | Fig.S7   | Stability check through electrolyte (0.1 M NaCl) addition and its corresponding UV-Visible spectra at the interval of 5 min                                                                | 7        |
| 8.     | Fig.S8   | Stability check through electrolyte (1 M NaCl) addition and its corresponding UV-Visible spectra at the interval of 5 min                                                                  | 8        |
| 9.     | Fig.S9   | Stability check through electrolyte (2 M NaCl) addition and its corresponding UV-Visible spectra at the interval of 5 min                                                                  | 8        |
| 10.    | Fig.S10  | pH Study: Visual response of pH metric titration of GNPs from 1-14 pH                                                                                                                      | 9        |
| 11.    | Fig.S11  | pH Study: UV-Visible response of pH metric titration of GNPs from 1-14 pH                                                                                                                  | 9        |

|            |                |                                                                                                                                                                                                                         |           |
|------------|----------------|-------------------------------------------------------------------------------------------------------------------------------------------------------------------------------------------------------------------------|-----------|
| <b>12.</b> | <b>Fig.S12</b> | <b>Practical applicability of GNPs on cotton balls</b>                                                                                                                                                                  | <b>10</b> |
| <b>13.</b> | <b>Fig.S13</b> | <b>Interference studies of GNPs at 521 nm with different essential amino acids</b>                                                                                                                                      | <b>10</b> |
| <b>14.</b> | <b>Fig.S14</b> | <b>Matrix study</b>                                                                                                                                                                                                     | <b>11</b> |
| <b>15.</b> | <b>Fig.S15</b> | <b>Comparison table for Limit of Detection</b>                                                                                                                                                                          | <b>11</b> |
| <b>16.</b> | <b>Fig.S16</b> | <b>FT-IR spectrum of GNPs</b>                                                                                                                                                                                           | <b>12</b> |
| <b>17.</b> | <b>Fig.S17</b> | <b>XPS studies for GNPs, (a) Spectrum of Au 4f (b) Spectrum of C 1s (c) Spectrum of N 1s, (d) Spectrum of O 1s, (e) Survey spectrum of GNPs</b>                                                                         | <b>13</b> |
| <b>18.</b> | <b>Fig.S18</b> | <b>Dynamic Light Scattering (DLS) study showing hydrodynamic diameter of GNPs</b>                                                                                                                                       | <b>14</b> |
| <b>19.</b> | <b>Fig.S19</b> | <b>Zeta Potential of GNPs</b>                                                                                                                                                                                           | <b>14</b> |
| <b>20.</b> | <b>Fig.S20</b> | <b>EDAX spectrum of GNPs</b>                                                                                                                                                                                            | <b>15</b> |
| <b>21.</b> | <b>Fig.S21</b> | <b>SAED pattern of GNPs</b>                                                                                                                                                                                             | <b>15</b> |
| <b>22.</b> | <b>Fig.S22</b> | <b>(a) TEM image of GNPs used for preparation of histogram chart [at 50 nm scale bar] (b) Histogram showing size distribution of GNPs, (c) Concentration of GNPs</b>                                                    | <b>16</b> |
| <b>23.</b> | <b>Fig.S23</b> | <b>FT-IR spectrum of GNPs after interaction with Glutathione</b>                                                                                                                                                        | <b>17</b> |
| <b>24.</b> | <b>Fig.S24</b> | <b>FT-IR spectrum of GSH in experimental condition</b>                                                                                                                                                                  | <b>17</b> |
| <b>25.</b> | <b>Fig.S25</b> | <b>Comparison table for IR spectra</b>                                                                                                                                                                                  | <b>18</b> |
| <b>26.</b> | <b>Fig.S26</b> | <b>XPS studies of GNPs after addition of GSH, (a) Spectrum for Au 4f, (b) Spectrum for C 1s, (c) Spectrum for N 1s, (d) Spectrum for O 1s, (e) Spectrum for S 2p, (f) Survey spectrum of GNPs after addition of GSH</b> | <b>18</b> |
| <b>27.</b> | <b>Fig.S27</b> | <b>Dynamic Light Scattering (DLS) study showing hydrodynamic diameter of GNPs after addition of Glutathione</b>                                                                                                         | <b>19</b> |
| <b>28.</b> | <b>Fig.S28</b> | <b>Zeta Potential of GNPs after addition of Glutathione</b>                                                                                                                                                             | <b>19</b> |
| <b>29.</b> | <b>Fig.S29</b> | <b>EDAX spectrum of GNPs after interaction with Glutathione</b>                                                                                                                                                         | <b>20</b> |
| <b>30.</b> | <b>Fig.S30</b> | <b>SAED pattern of GNPs after addition with Glutathione</b>                                                                                                                                                             | <b>20</b> |
| <b>31.</b> | <b>Fig.S31</b> | <b>pH Study: Visual response of pH metric titration of GNPs with Glutathione in the pH range (1-14)</b>                                                                                                                 | <b>21</b> |
| <b>32.</b> | <b>Fig.S32</b> | <b>pH Study: UV-Visible spectra of corresponding pH metric titration of GNPs after with Glutathione in the pH range (1-14)</b>                                                                                          | <b>21</b> |
| <b>33.</b> | <b>Fig.S33</b> | <b>Tentative mechanistic pathway for GNPs synthesis</b>                                                                                                                                                                 | <b>22</b> |

|            |                |                                                                                                                                                                                                        |           |
|------------|----------------|--------------------------------------------------------------------------------------------------------------------------------------------------------------------------------------------------------|-----------|
| <b>34.</b> | <b>Fig.S34</b> | <b>Mechanistic pathway for GNPs interaction with GSH</b>                                                                                                                                               | <b>23</b> |
| <b>35.</b> | <b>Fig.S35</b> | <b>TEM image of GNPs (From low to high resolution)</b>                                                                                                                                                 | <b>23</b> |
| <b>36.</b> | <b>Fig.S36</b> | <b>TEM image of GNPs with Glutathione (from low to high resolution)</b>                                                                                                                                | <b>24</b> |
| <b>37.</b> | <b>Fig.S37</b> | <b>SEM image of GNPs (from low to high resolution)</b>                                                                                                                                                 | <b>24</b> |
| <b>38.</b> | <b>Fig.S38</b> | <b>SEM image of GNPs with Glutathione (from low to high resolution)</b>                                                                                                                                | <b>25</b> |
| <b>39.</b> | <b>Fig.S39</b> | <b>(a) Visual response of (1) GNPs (2) GNPs after addition of Maxiliv (without boiling) (3) GNPs after addition of Glutaderm (without boiling) (b) Corresponding UV-Visible spectra</b>                | <b>25</b> |
| <b>40.</b> | <b>Fig.S40</b> | <b>(a) Visual response of GNPs after addition of Maxilliv at various time intervals (Intra-day repeatability) (b) Corresponding UV-Visible spectra</b>                                                 | <b>26</b> |
| <b>41.</b> | <b>Fig.S41</b> | <b>(a) Visual response of GNPs after addition of Maxilliv over a course of five days intervals (Inter-day repeatability) (b) Corresponding UV-Visible spectra</b>                                      | <b>26</b> |
| <b>42.</b> | <b>Fig.S42</b> | <b>(a) Visual response of GNPs after addition of Glutaderm at various time intervals (Intra-day repeatability) (b) Corresponding UV-Visible spectra</b>                                                | <b>27</b> |
| <b>43.</b> | <b>Fig.S43</b> | <b>(a)Visual response of GNPs after addition of Maxilliv over a course of five days (Inter day repeatability (b) Corresponding UV-Visible spectra</b>                                                  | <b>27</b> |
| <b>44.</b> | <b>Fig.S44</b> | <b>(a) Image showing the amount of various constituents present in Glutaderm (b) Image showing Alpha lipoic acid used for selectivity study (c) Image showing Vitamin C used for selectivity study</b> | <b>28</b> |
| <b>45.</b> | <b>Fig.S45</b> | <b>(a) Visual response of GNPs, GNPs+Glutaderm, GNPs+Alpha Lipoic acid, GNPs+Vitamin C (b) Corresponding UV-Visible spectra</b>                                                                        | <b>28</b> |
| <b>46.</b> | <b>Fig.S46</b> | <b>UV-Visible spectrum of glutathione (GSH) in experimental conditions</b>                                                                                                                             | <b>29</b> |

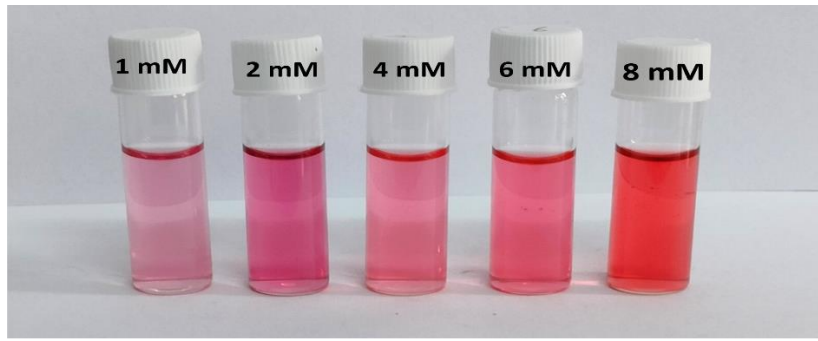

(a)

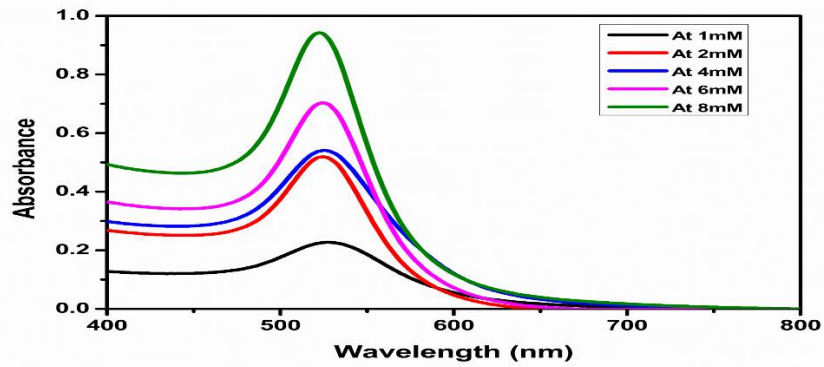

(b)

**Fig.S1:** (a) Visual response of GNPs synthesised using different concentrations of glucosamine (1mM, 2Mm, 4mM, 6mM) keeping other reaction parameters constant (b) Corresponding UV-Visible spectra

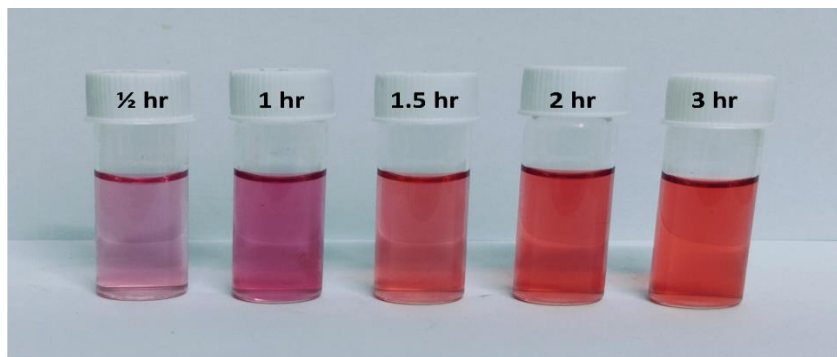

(a)

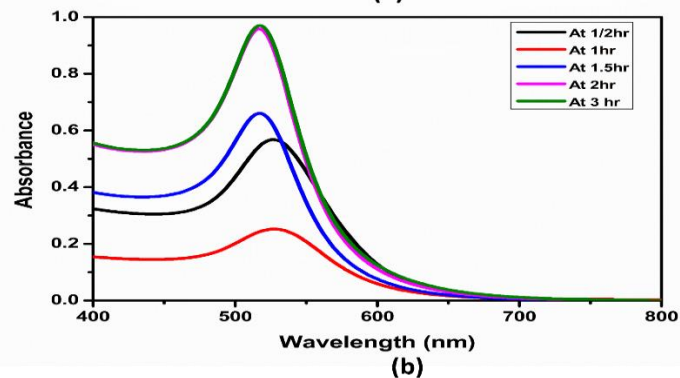

(b)

**Fig.S2:** (a) Visual response of GNPs with varying reaction time (1/2, 1, 1.5, 2, 3 hr) (b) Corresponding UV-Visible spectra

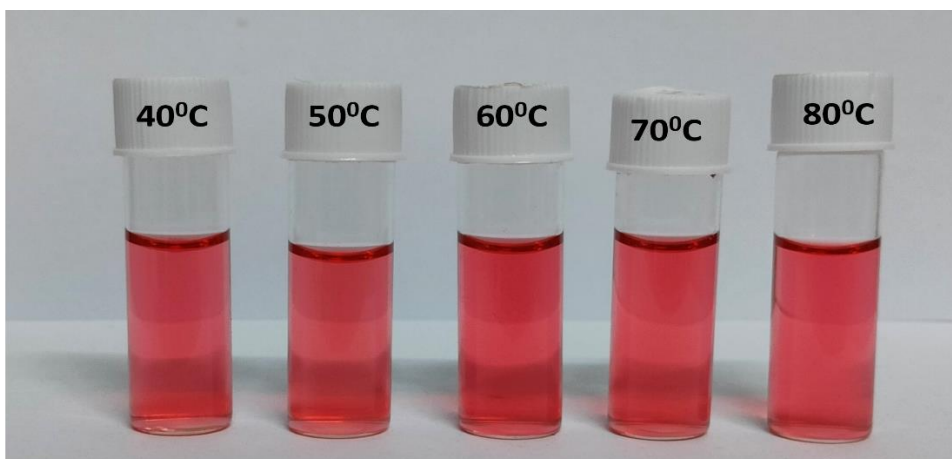

(a)

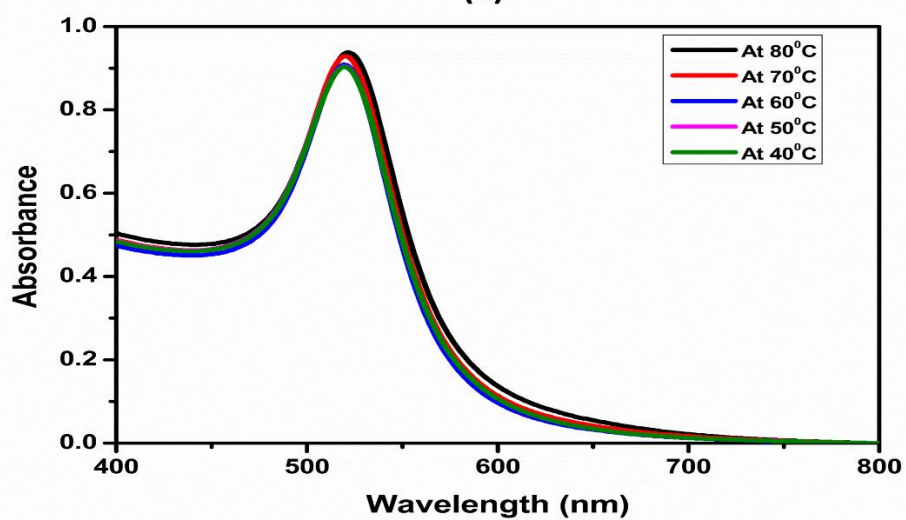

(b)

**Fig.S3:** (a) Visual response of GNPs with varying reaction temperature (40, 50, 60, 70 and 80) (b) Corresponding UV-Visible spectra

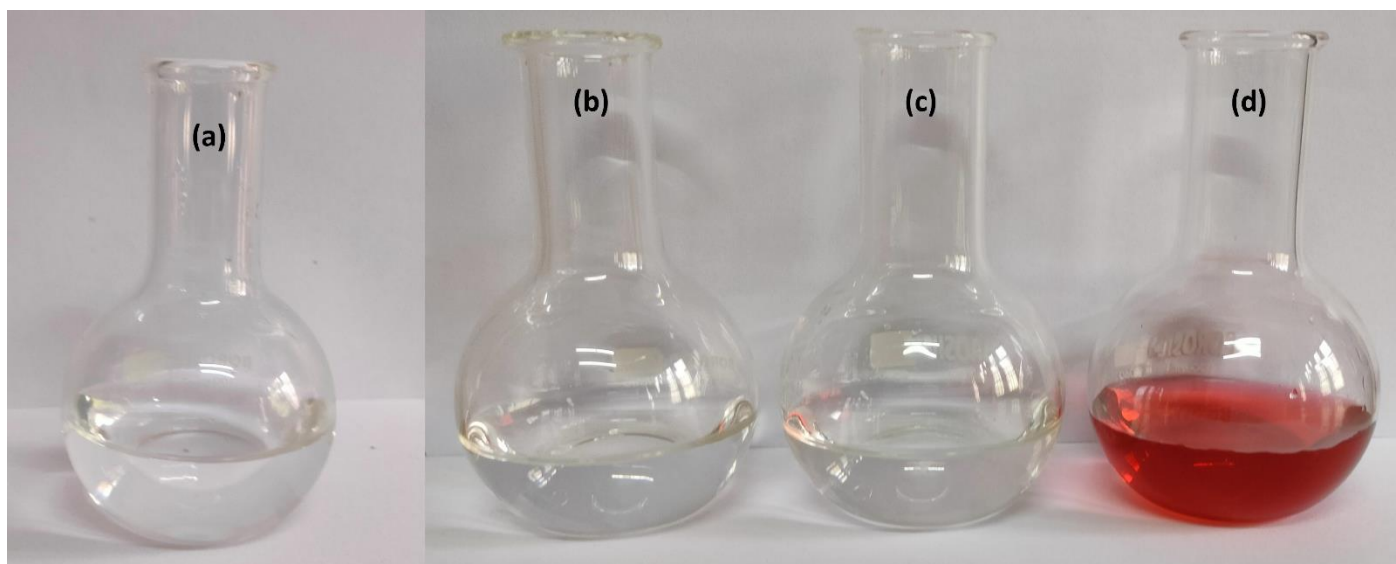

**Fig.S4:** Comparison between controlled preparations and GNPs: (a) Gold (III)chloride trihydrate + NaOH (b) Glucosamine + NaOH (c) Gold (III) chloride trihydrate + Glucosamine (d) GNPs (Gold (III) chloride trihydrate + Glucosamine + NaOH)

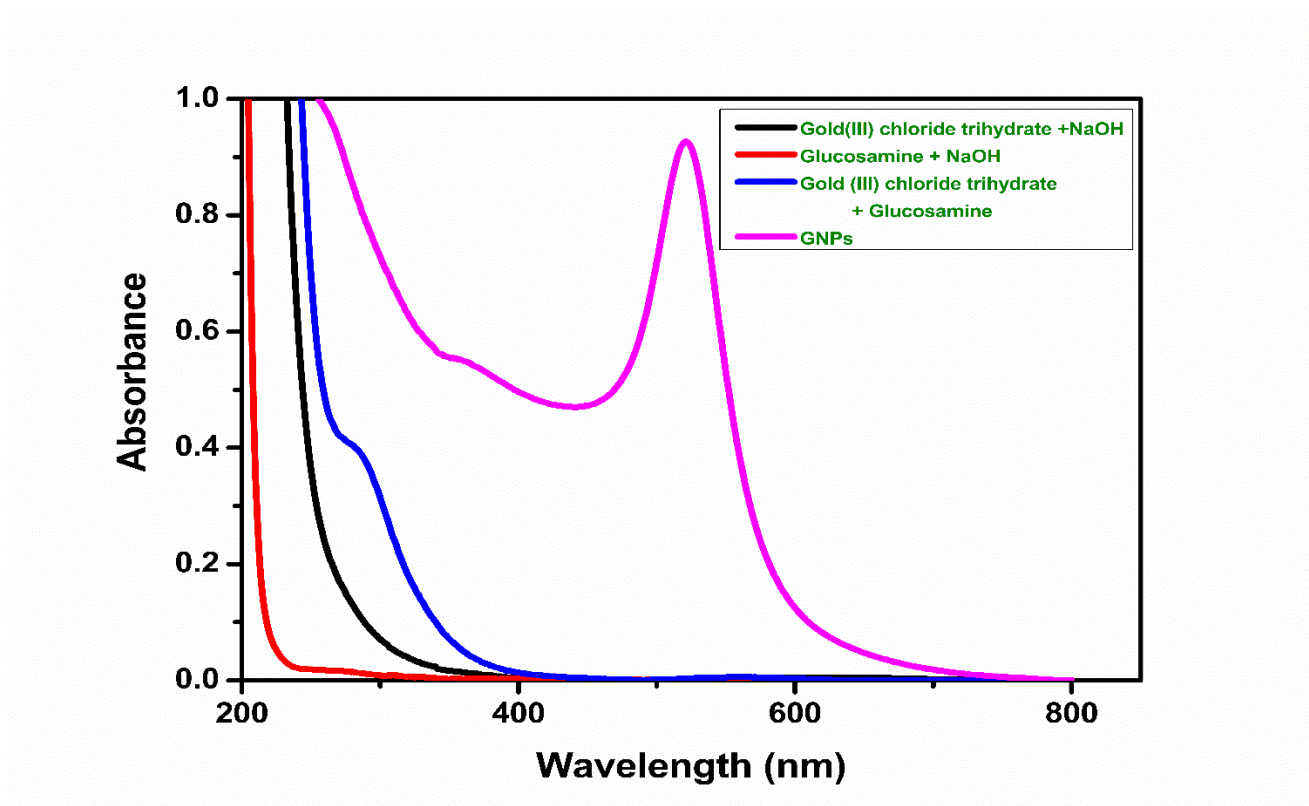

**Fig.S5:** UV-Visible spectra of various controlled preparation and GNPs



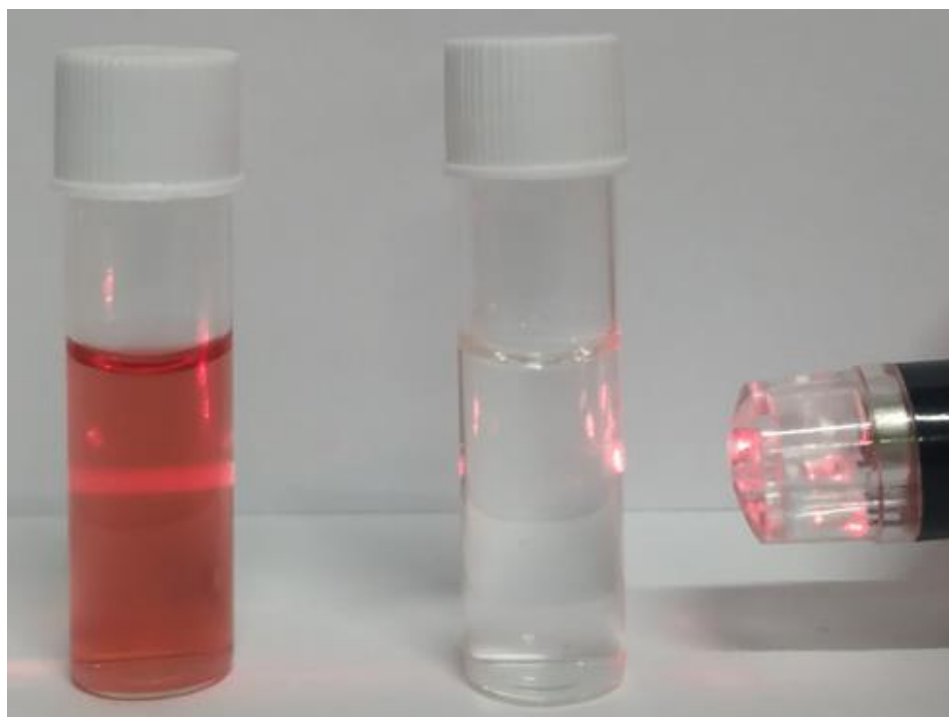

**Fig.S6:** Image showing Tyndell effect [left side: GNPs, right side: Milli-Q water]

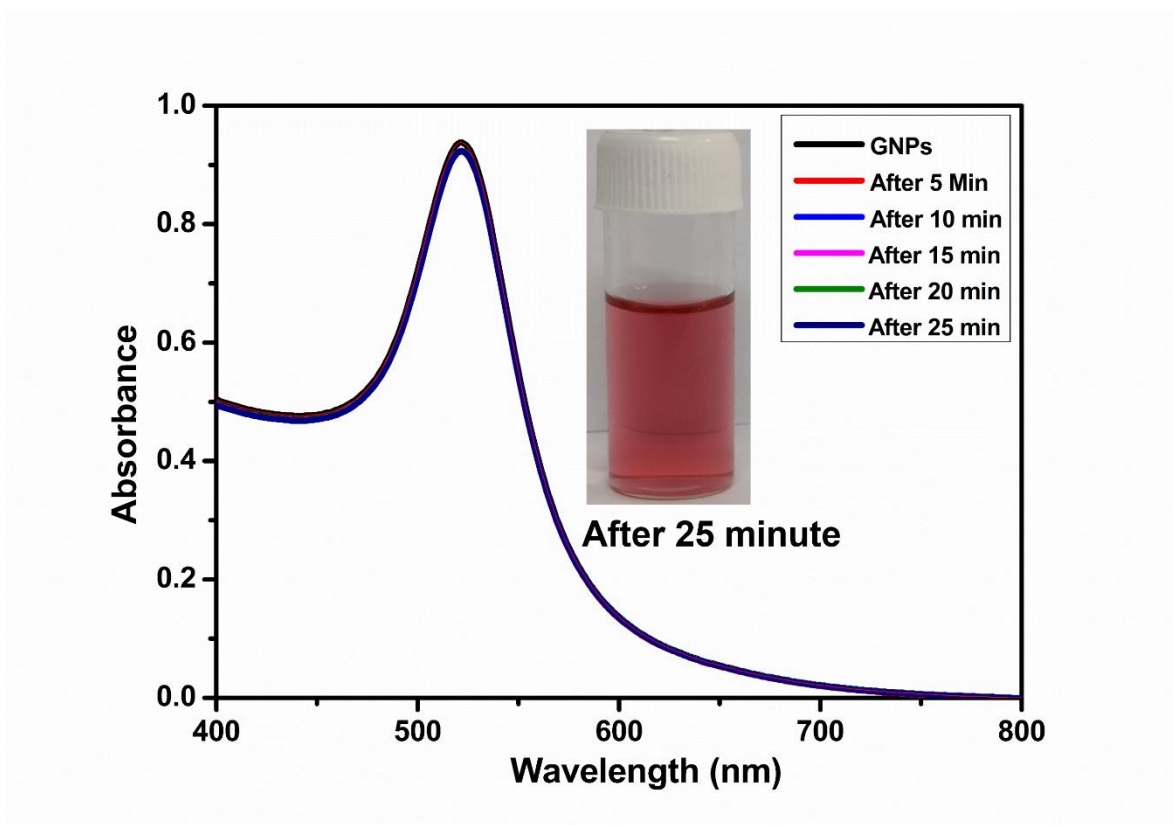

**Fig.S7:** Stability check through electrolyte (0.1 M NaCl) addition and its corresponding UV-Visible spectra at the interval of 5 min

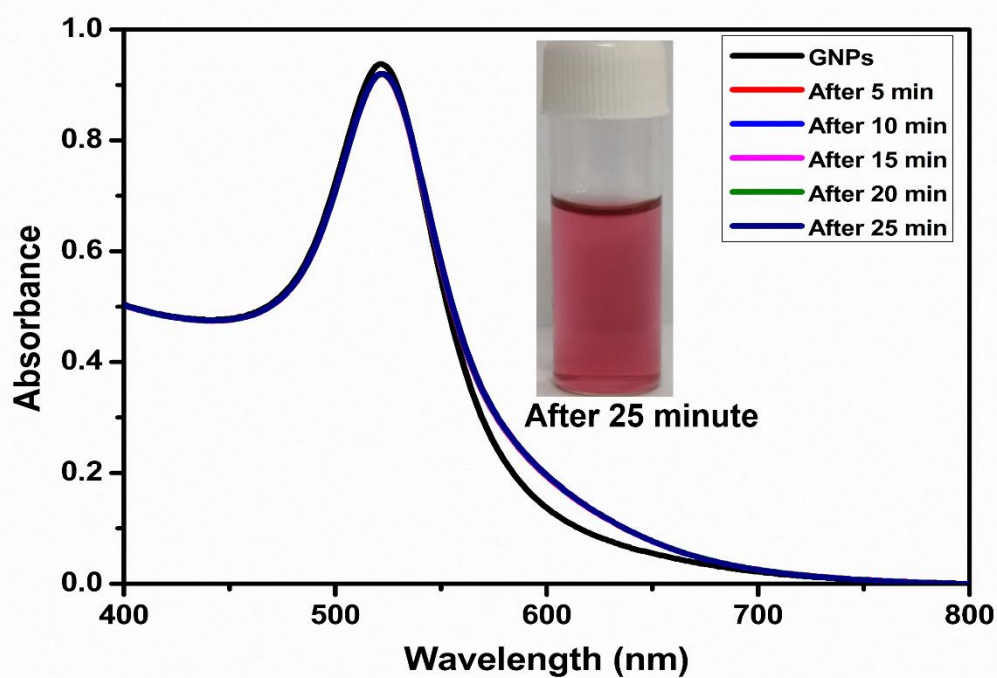

**Fig.S8:** Stability check through electrolyte (1 M NaCl) addition and its corresponding UV-Visible spectra at the interval of 5 min

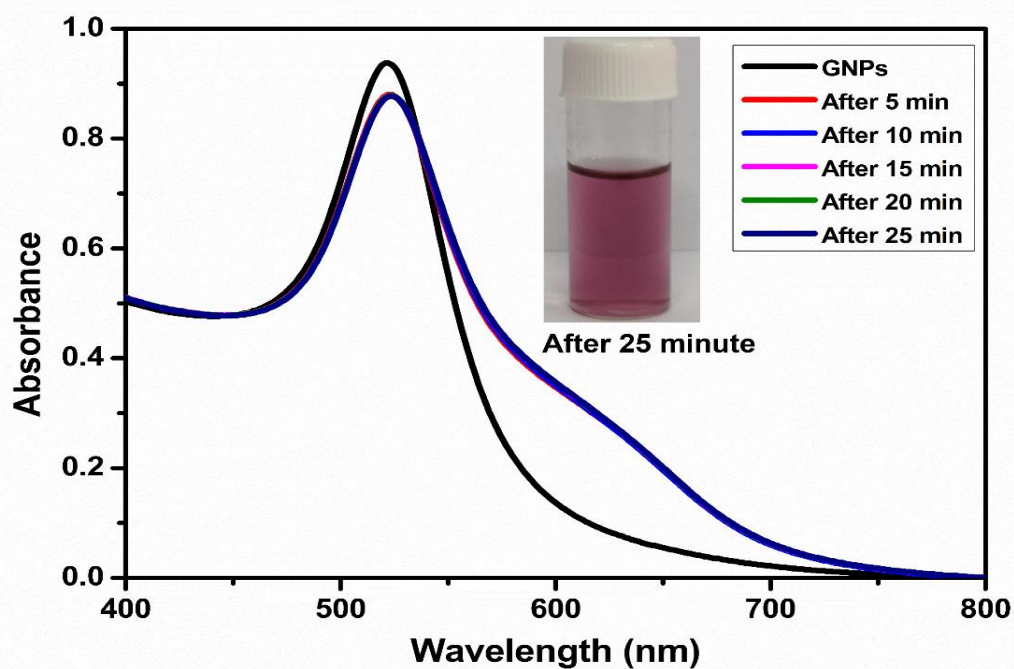

**Fig.S9:** Stability check through electrolyte (2 M NaCl) addition and its corresponding UV-Visible spectra at the interval of 5 min



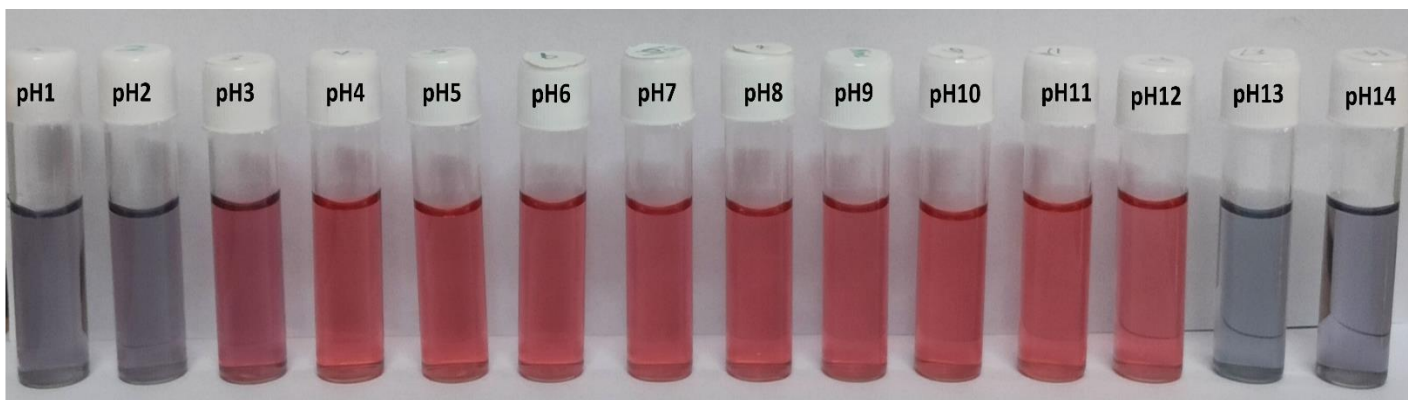

**Fig.S10:** pH Study: Visual response of pH metric titration of GNPs from 1-14 pH

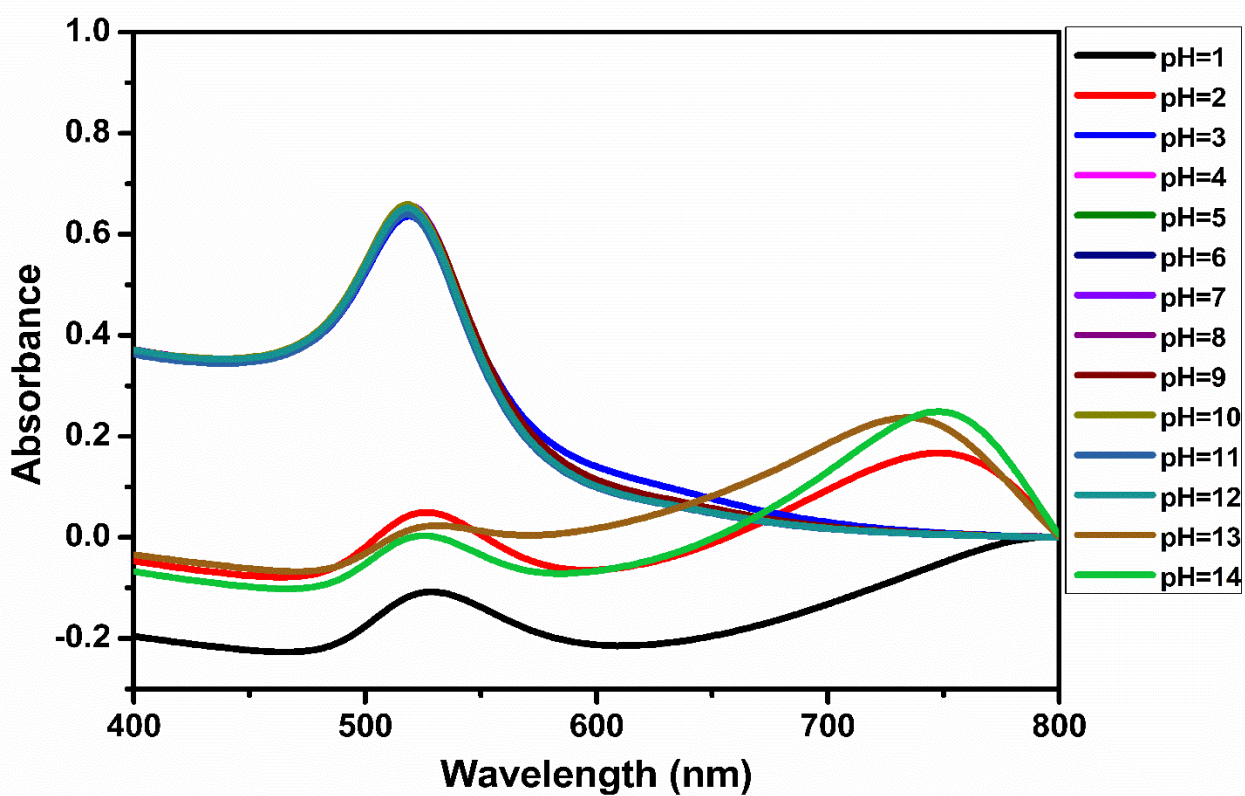

**Fig.S11:** pH Study: UV-Visible response of pH metric titration of GNPs from 1-14 pH

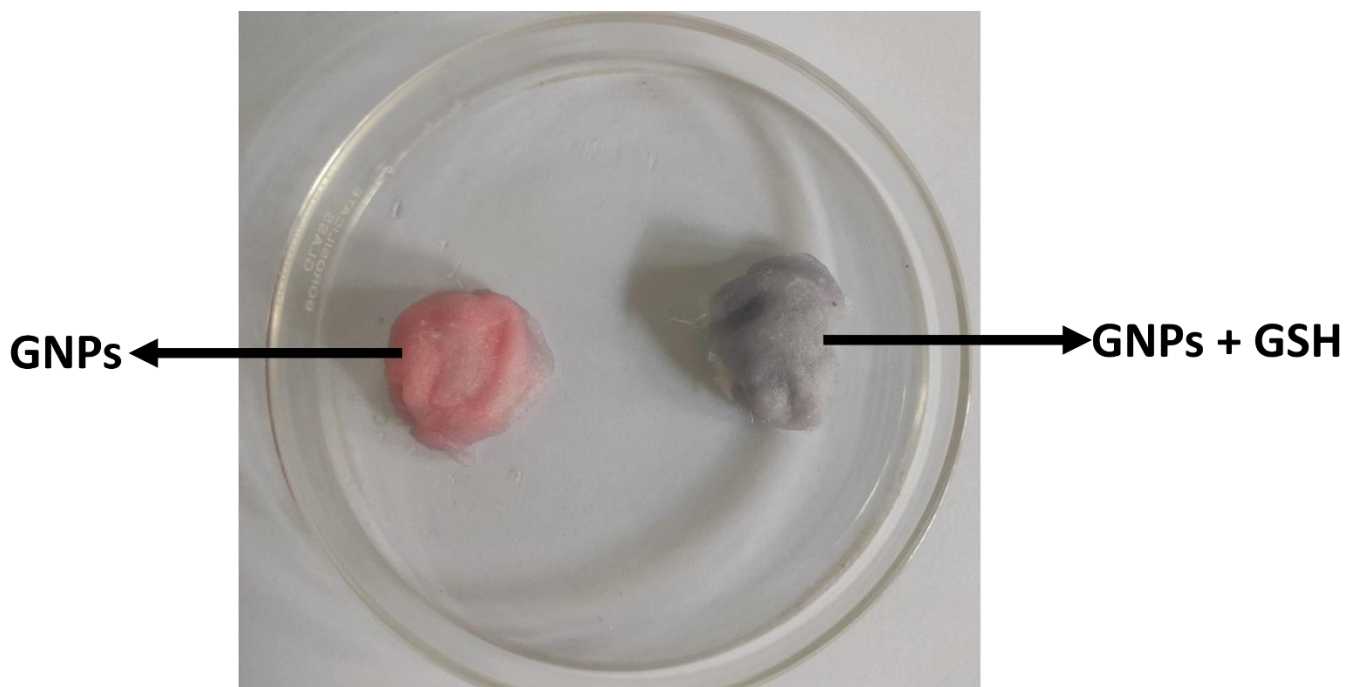

**Fig.S12:** Practical applicability of GNPs on cotton balls

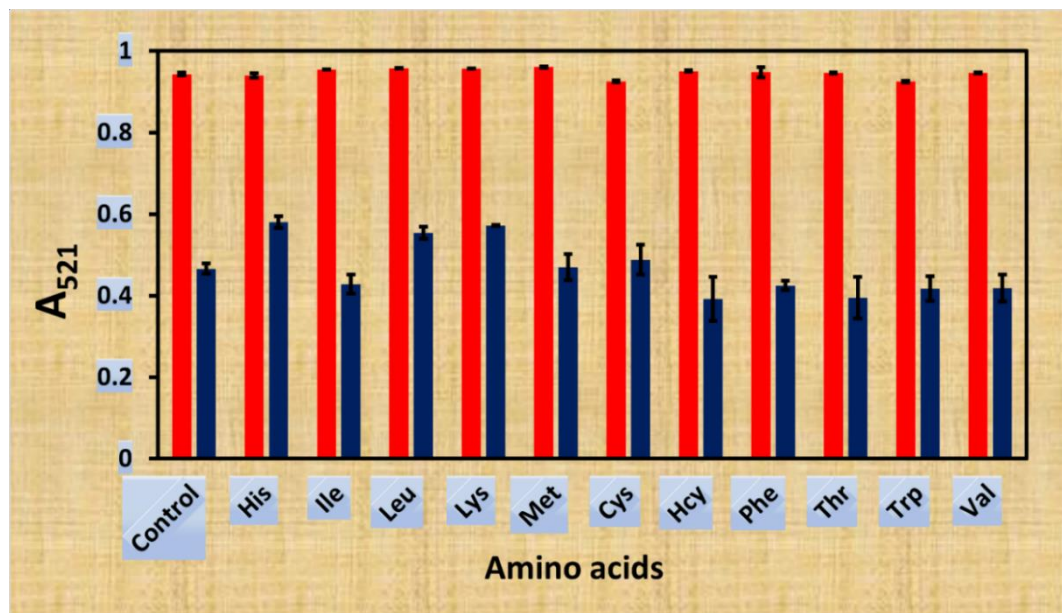

**Fig.S13:** Interference studies of GNPs at 521 nm with different essential amino acids. Red Bar: GNPs + Amino acids, Blue Bar: GNPs + Amino acids + Glutathione, control: Red Bar: only GNPs, Blue bar: GNPs + GSH

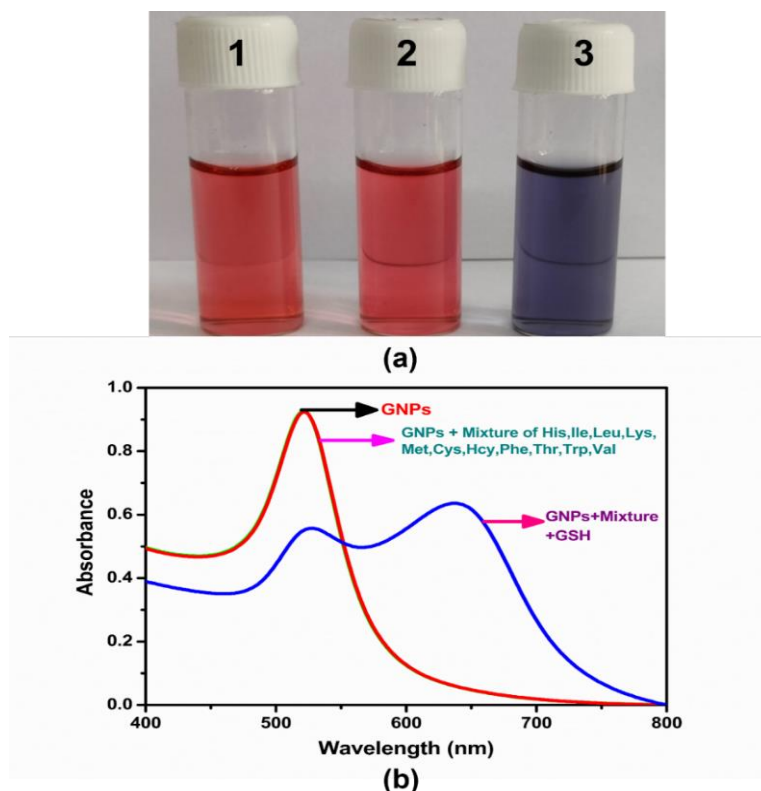

**Fig.S14:** Matrix study: (a) Visual responses of (1) GNPs (2) GNPs + Mixture (solution) containing different amino acids i.e. His, Ile, Leu, Lys, Met, Cys, Hcy, Phe, Thr, Trp, Val, (3) GNPs + Mixture + Glutathione, (b) Corresponding UV-Visible response

**Fig.S15:** Comparison table for Limit of Detection;

| Detection System                                              | Methods      | LOD                | References    |
|---------------------------------------------------------------|--------------|--------------------|---------------|
| Citrate capped AuNPs                                          | Colorimetric | 0.5 $\mu\text{M}$  | 1             |
| Diazo capped AgNPs                                            | Colorimetric | 4.11 $\mu\text{M}$ | 2             |
| FeS <sub>2</sub> nanoparticles                                | Colorimetric | 0.15 $\mu\text{M}$ | 3             |
| graphene nanoribbons/silver nanoparticles (GNR/Ag NPs) hybrid | Colorimetric | 0.23 $\mu\text{M}$ | 4             |
| Phloroglucinol capped AgNPs                                   | Colorimetric | 3.1 $\mu\text{M}$  | 5             |
| Silica nanoparticle–gold nanocluster (MSN–AuNC)               | Colorimetric | 0.34 $\mu\text{M}$ | 6             |
| Glucosamine capped GNPs                                       | Colorimetric | 0.26 $\mu\text{M}$ | Present study |

1. B. Hu, X. Cao and P. Zhang, *New J. Chem.*, 2013, **37**, 3853.
2. I. Sanskriti and K. K. Upadhyay, *New J. Chem.*, 2017,**41**, 4316-4321.
3. C. Song, W. Ding, W. Zhao, H. Liu, J. Wang, Y. Yao, C. Yao, *Biosens. and Bioelectron.*, 2020, **151**, 111983,
4. S. Rostami, A. Mehdinia, R. Niroumand, A. Jabbari, *Anal. Chim. Act.*, 2020, **1120**, 11-23.
5. A. K. Singh, R. Singh, M. Yadav, M. Sharma, I. Tiwari, and K. K. Upadhyay, *New J. Chem.*, 2023,**47**, 10842-10848
6. G. Zhang, M. Xiang R. M. Kong and F. Qu, *Analyst*, 2020,**145**, 6254-6261

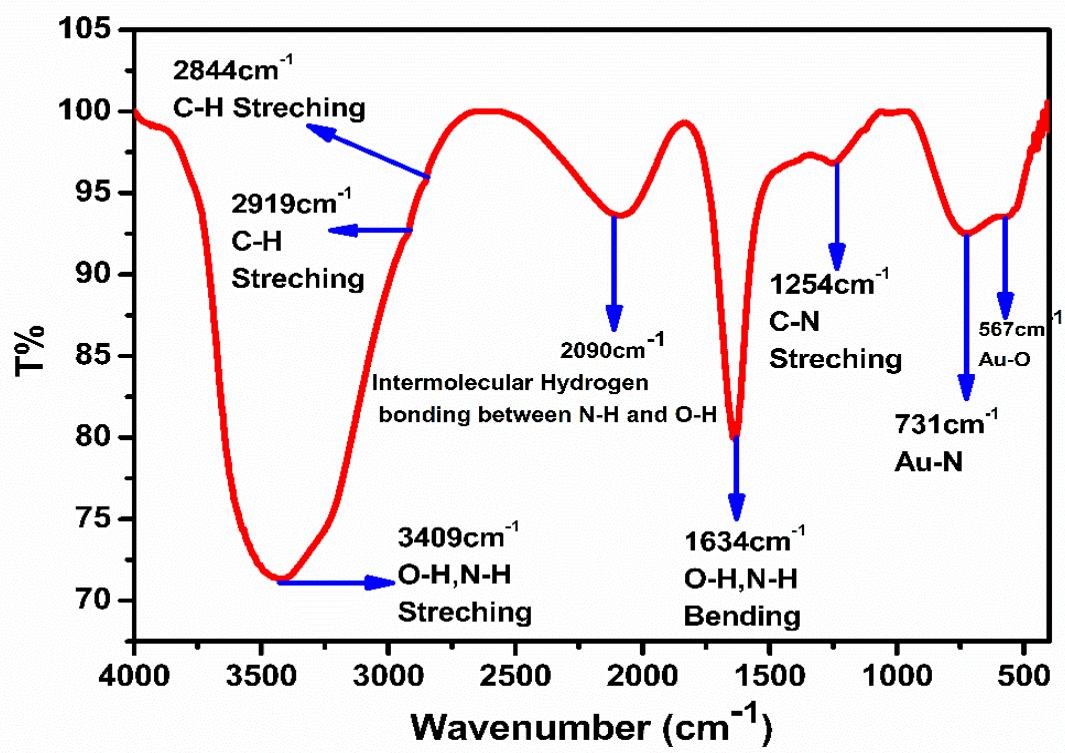

Fig.S16: FT-IR spectrum of GNPs



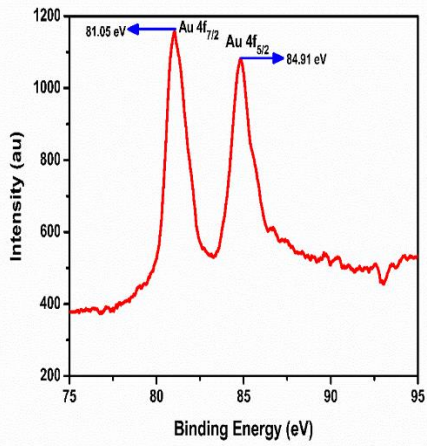

(a)

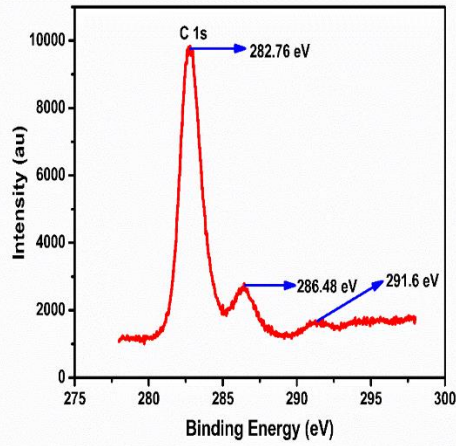

(b)

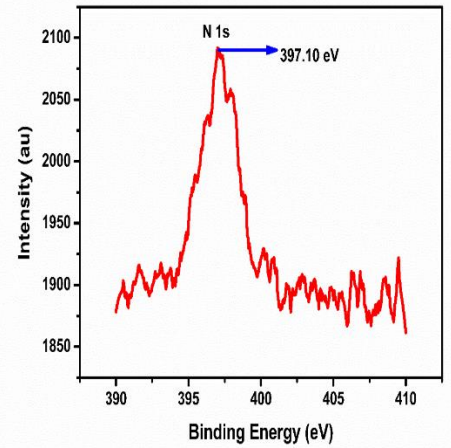

(c)

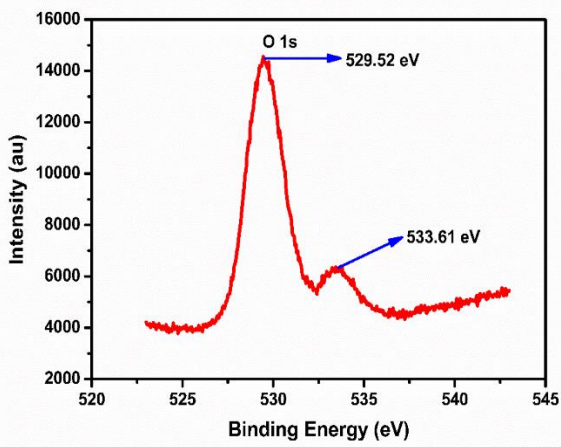

(d)

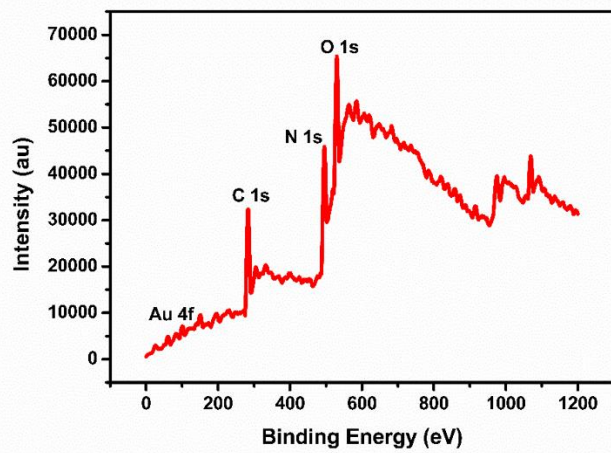

(e)

**Fig.S17: XPS studies for GNPs, (a) Spectrum of Au 4f, (b) Spectrum of C 1s, (c) Spectrum of N 1s, (d) Spectrum of O 1s, (e) Survey spectrum of GNPs**

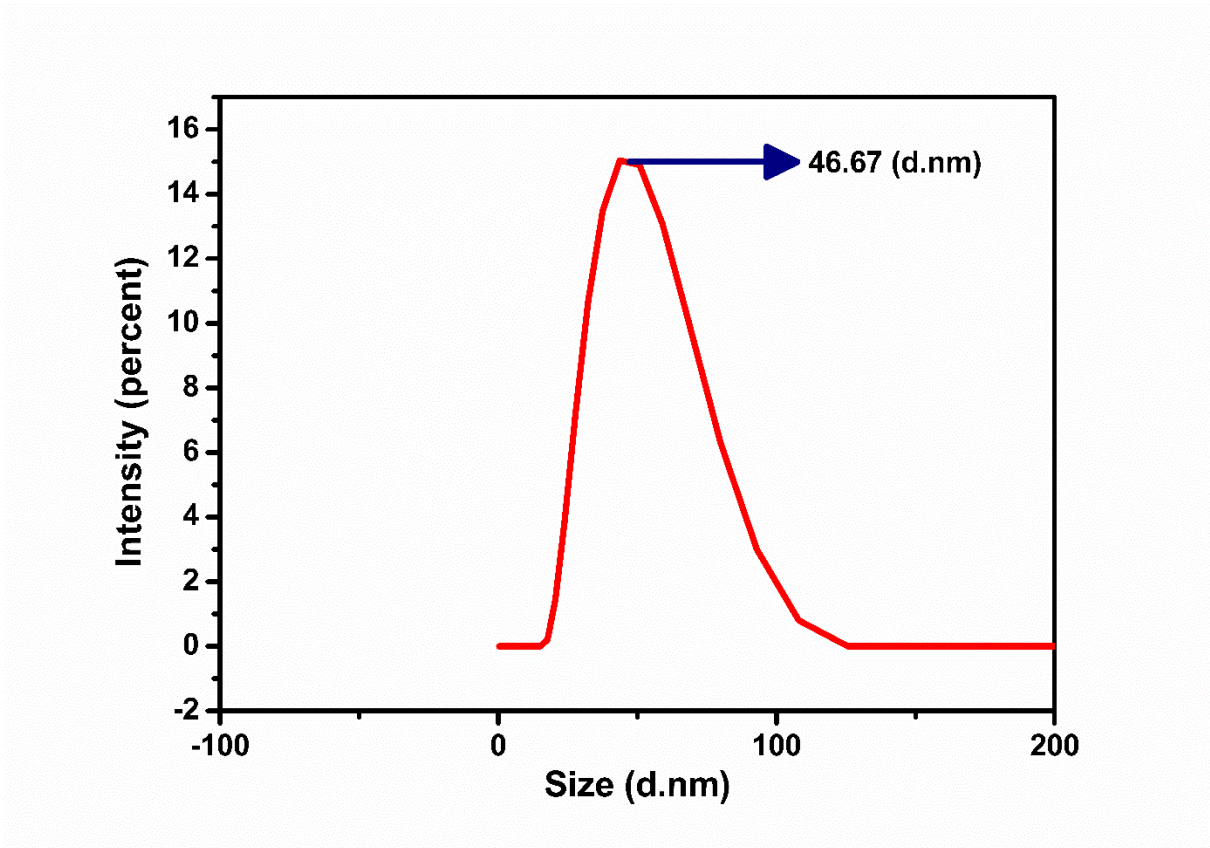

**Fig.S18:** Dynamic Light Scattering (DLS) study showing hydrodynamic diameter of GNPs

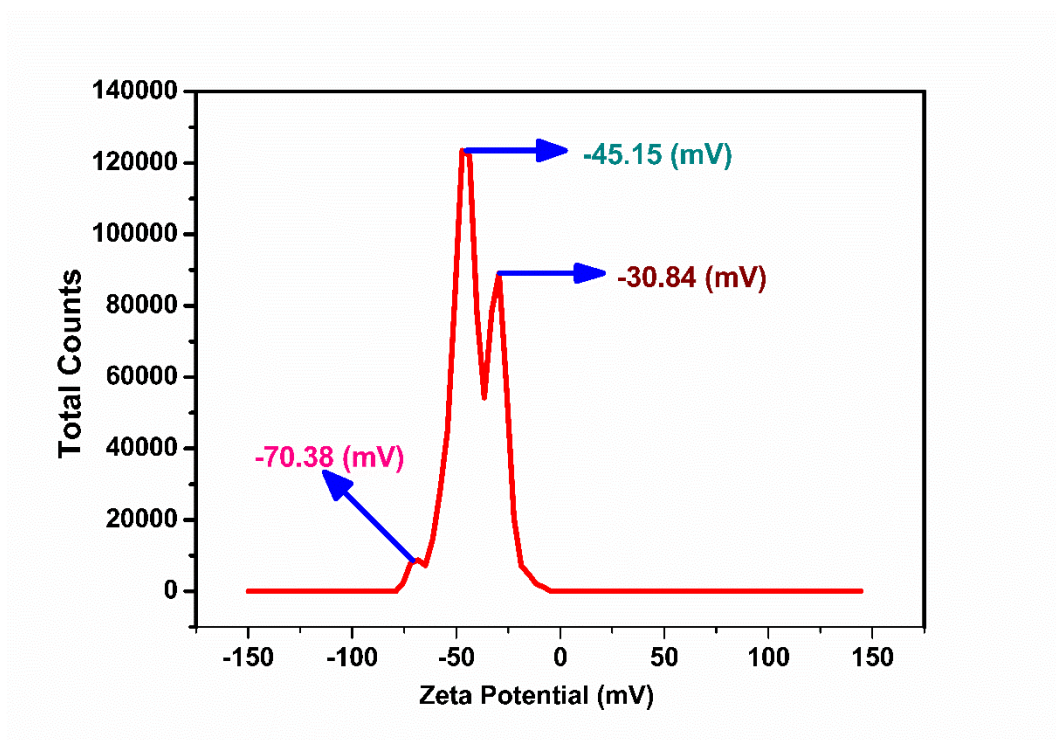

**Fig.S19:** Zeta Potential of GNPs



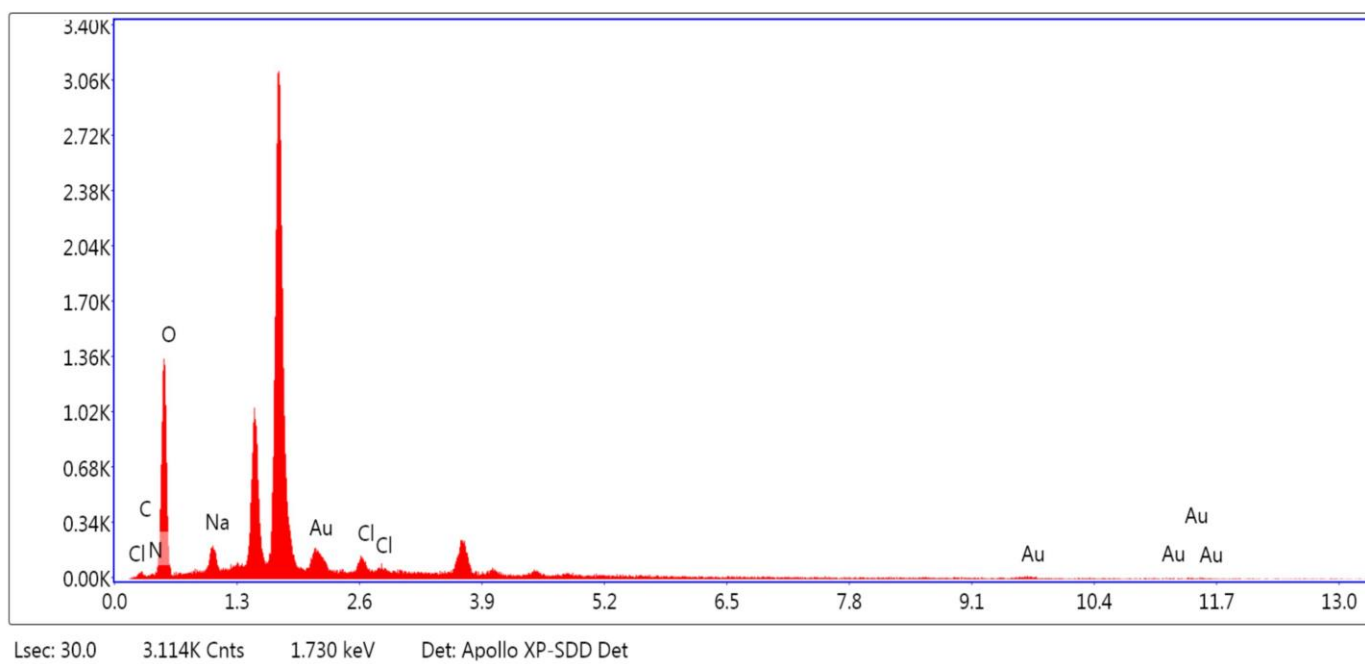

**Fig.S20:** EDAX spectrum of GNPs

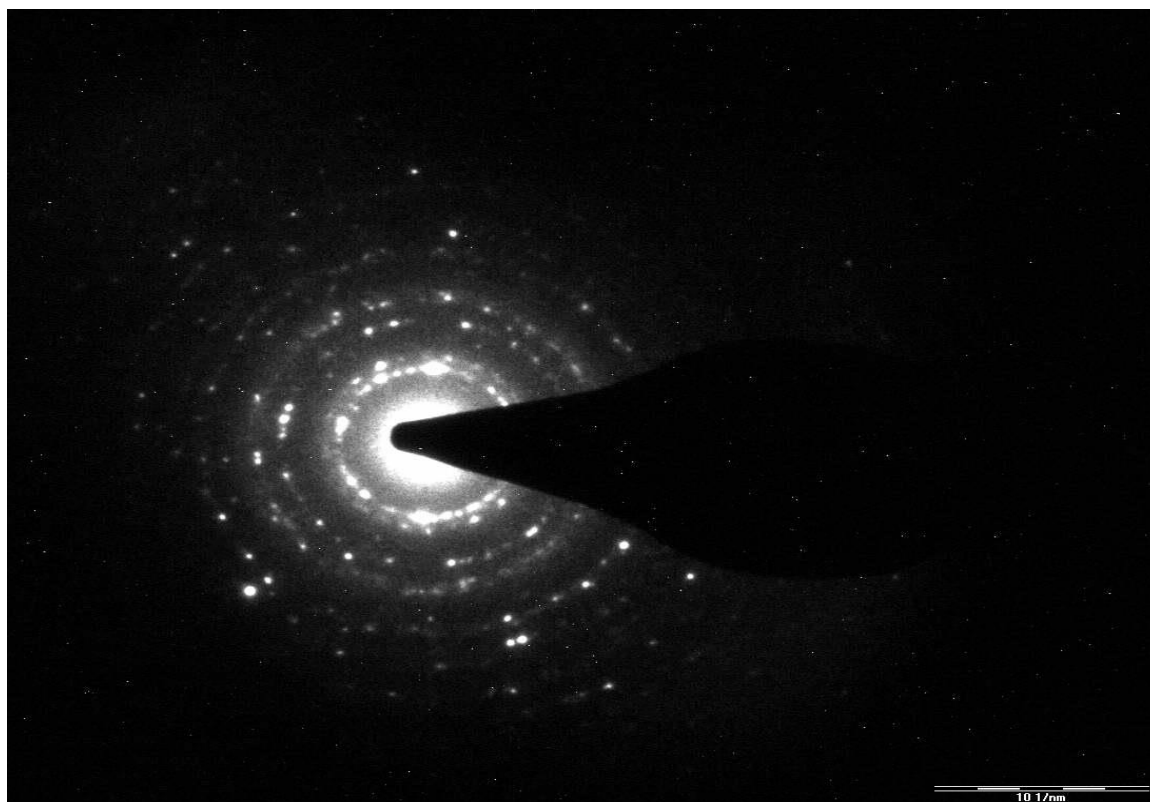

**Fig.S21:** SAED pattern of GNPs

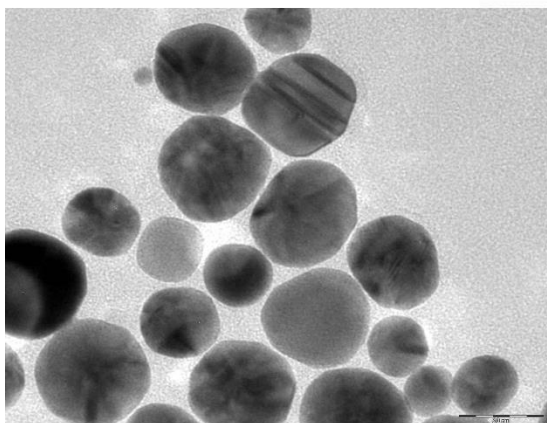

(a)

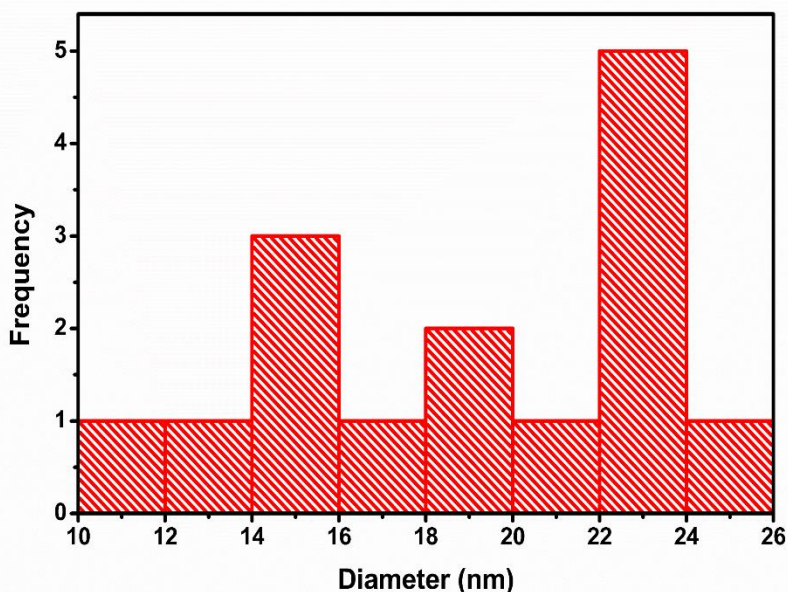

(b)

### (c) Concentration of GNPs

Concentration of spherical gold nanoparticles (GNPs) can be established by using the equation  $C = N_{\text{Total}} / NVN_A$

where  $N_{\text{Total}}/NVN_A$  where  $N_{\text{Total}}$  is the total number of gold atoms in the reaction solution,  $N$  is the number of gold atoms present in each nanoparticle,  $V$  is volume of solution in litres and  $N_A$  is Avogadro constant. Herein, we have used 2mL of 8mM Gold (III) chloride trihydrate in a total volume of 50mL.

**d= 23 nm GNPs**

$$N = 31d^3 = 31 \times (23)^3 = 377,177$$

$$\text{Concentration of GNPs} = N_{\text{Total}} / NVN_A$$

$$= \frac{0.016 \times 10^{-3} \times 6.02 \times 10^{23}}{377,177 \times 0.05 \times 6.02 \times 10^{23}}$$

$$= 8.4 \times 10^{-9} \text{ M}$$

$$= 8.4 \text{ nM}$$

**Fig.S22: (a) TEM image of GNPs used for preparation of histogram chart [at 50 nm scale bar] (b) Histogram showing size distribution of GNPs, (c) Concentration of GNPs**

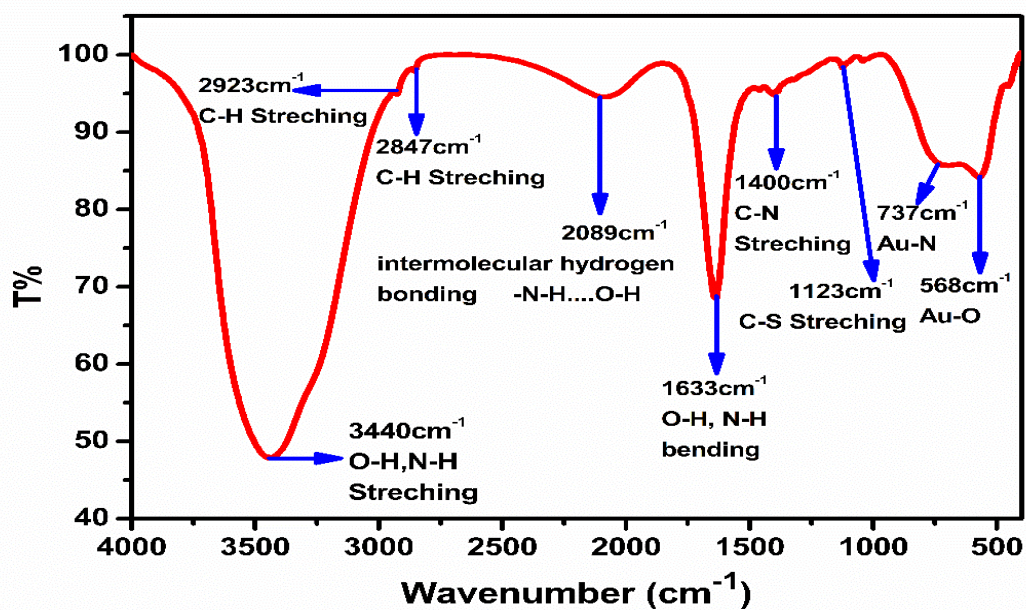

**Fig.S23:** FT-IR spectrum of GNPs after interaction with Glutathione

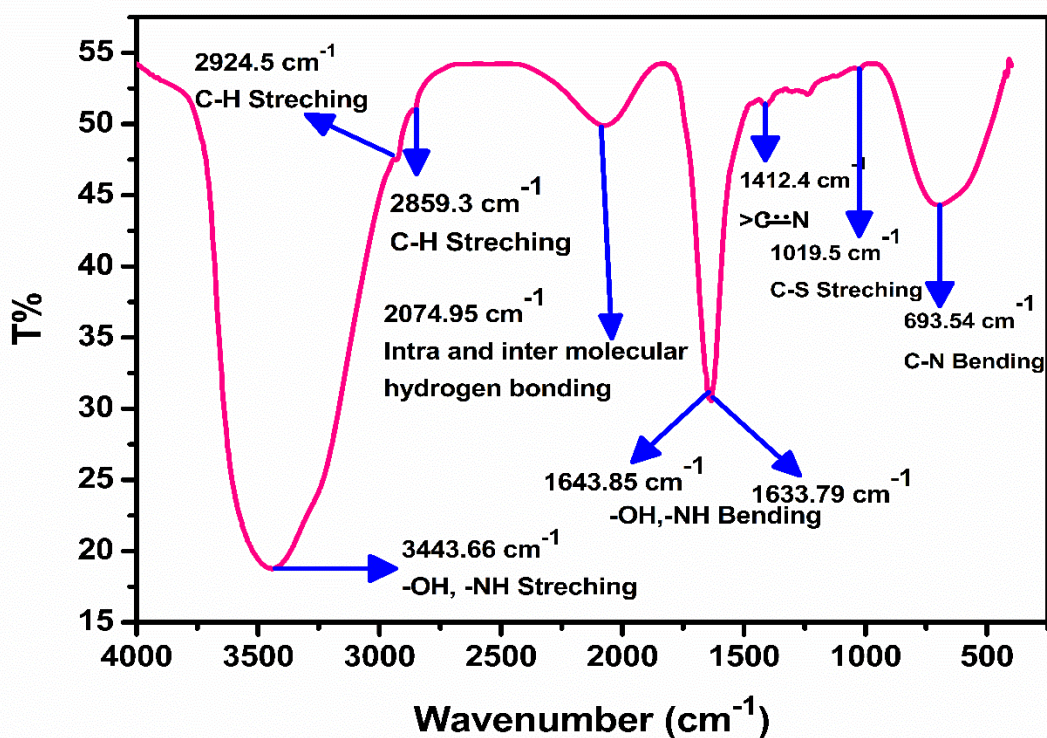

**Fig.S24:** FT-IR spectrum of GSH in experimental condition



**Fig. S25:** Comparison table for IR spectra;

| S. No. | Samples       | Peaks (cm <sup>-1</sup> )                                                  |
|--------|---------------|----------------------------------------------------------------------------|
| 1.     | GNPs          | 3409, 2919, 2844, 2090, 1634, 1254, 731, 567                               |
| 2.     | GNPs with GSH | 3440, 2923, 2847, 2089, 1633, 1400, 1123, 737, 568                         |
| 3.     | Only GSH      | 3443.66, 2924.5, 2859.3, 2074.95, 1643.85, 1633.79, 1412.4, 1019.5, 693.54 |

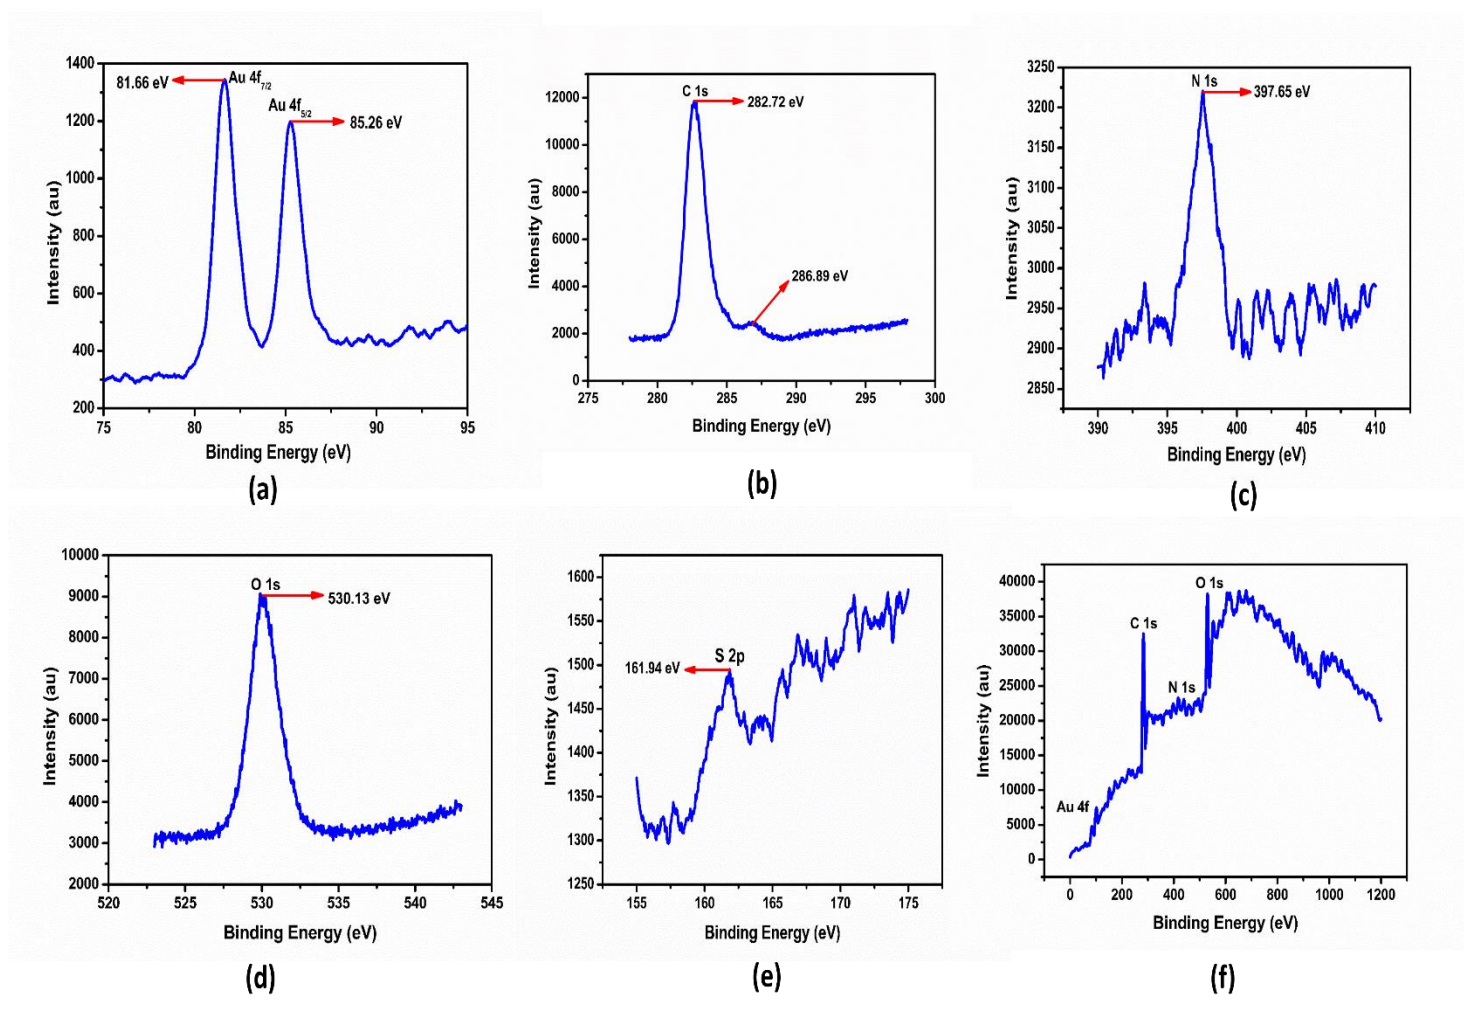

**Fig.S26:** XPS studies of GNPs after addition of GSH, (a) Spectrum for Au 4f, (b) Spectrum for C 1s, (c) Spectrum for N 1s, (d) Spectrum for O 1s, (e) Spectrum for S 2p, (f) Survey spectrum of GNPs after addition of GSH

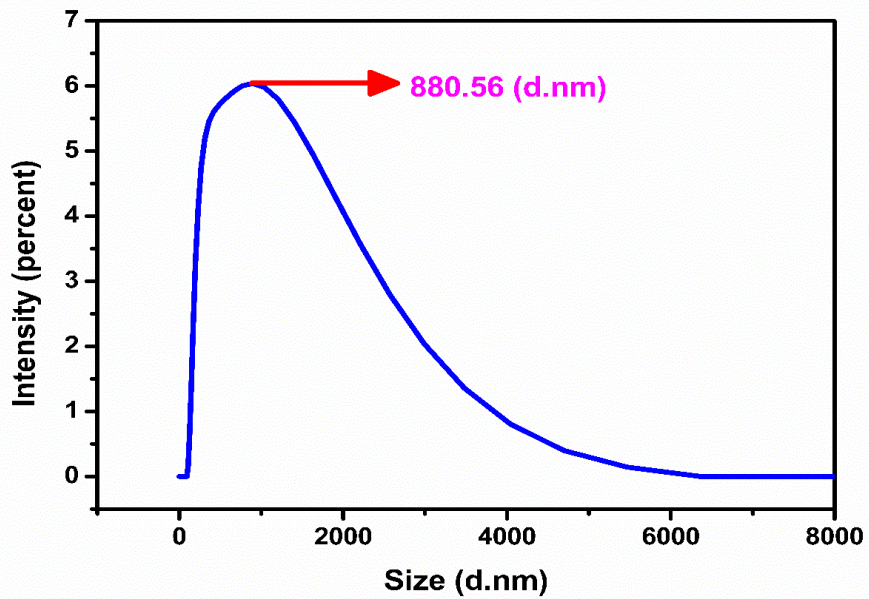

**Fig.S27:** Dynamic Light Scattering (DLS) study showing hydrodynamic diameter of GNPs after addition of Glutathione

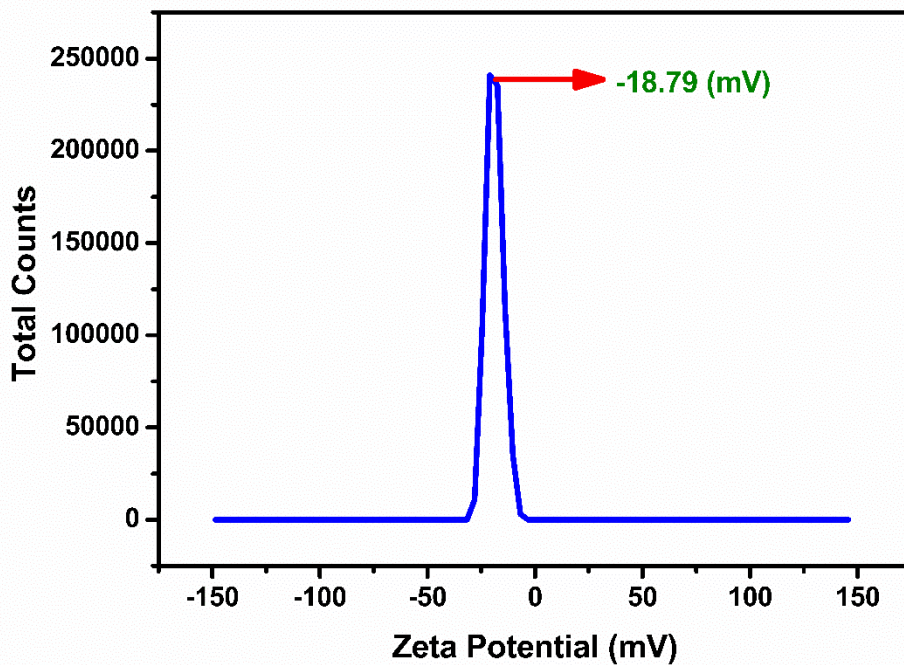

**Fig.S28:** Zeta Potential of GNPs after addition of Glutathione

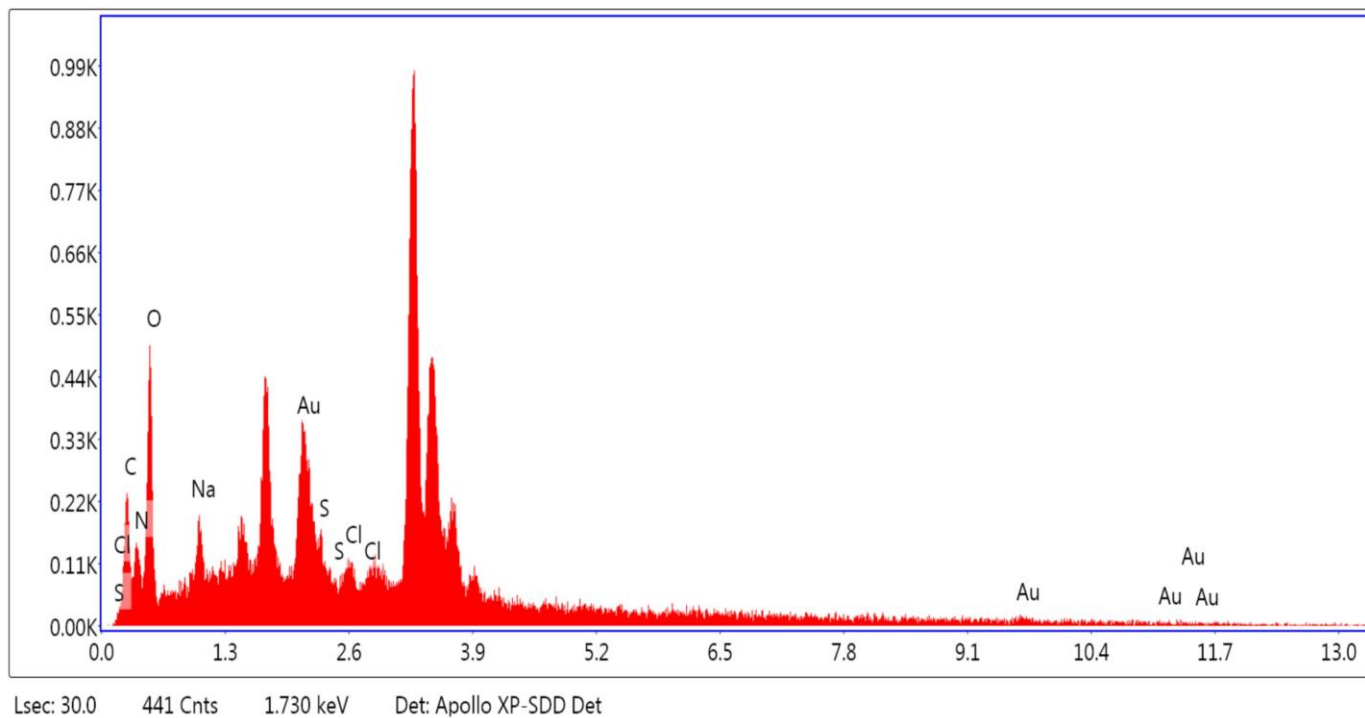

**Fig.S29: EDAX spectrum of GNPs after intraction with Glutathione**

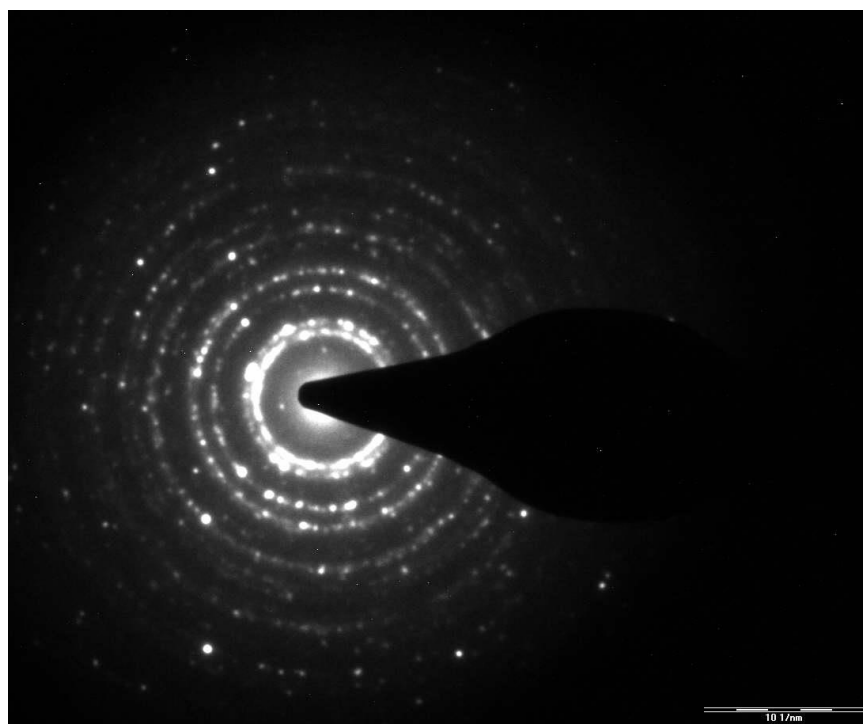

**Fig.S30: SAED pattern of GNPs after addition with Glutathione**



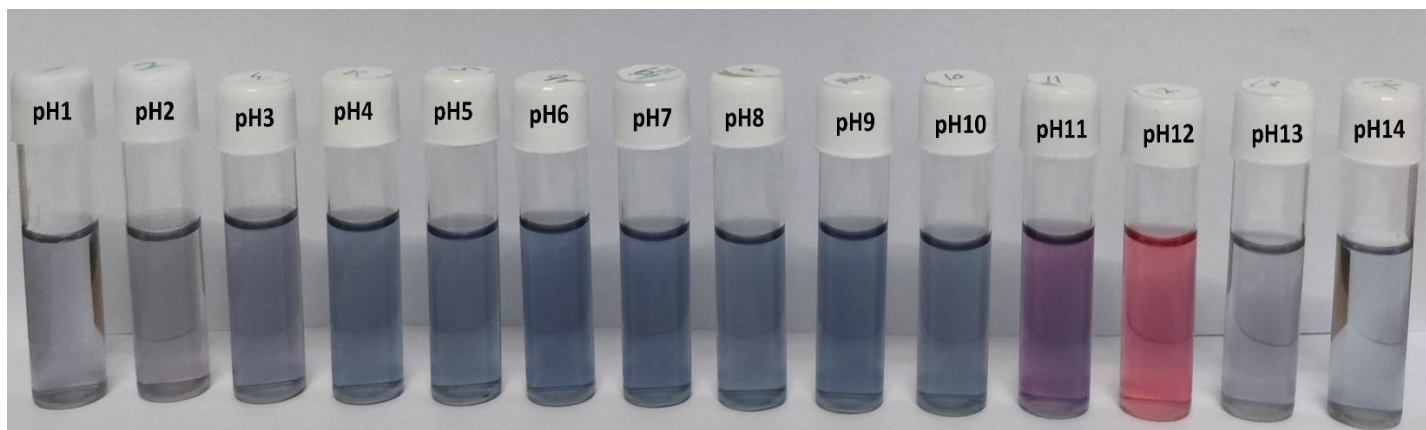

**Fig.S31:** pH Study: Visual response of pH metric titration of GNPs with Glutathione in the pH range (1-14)

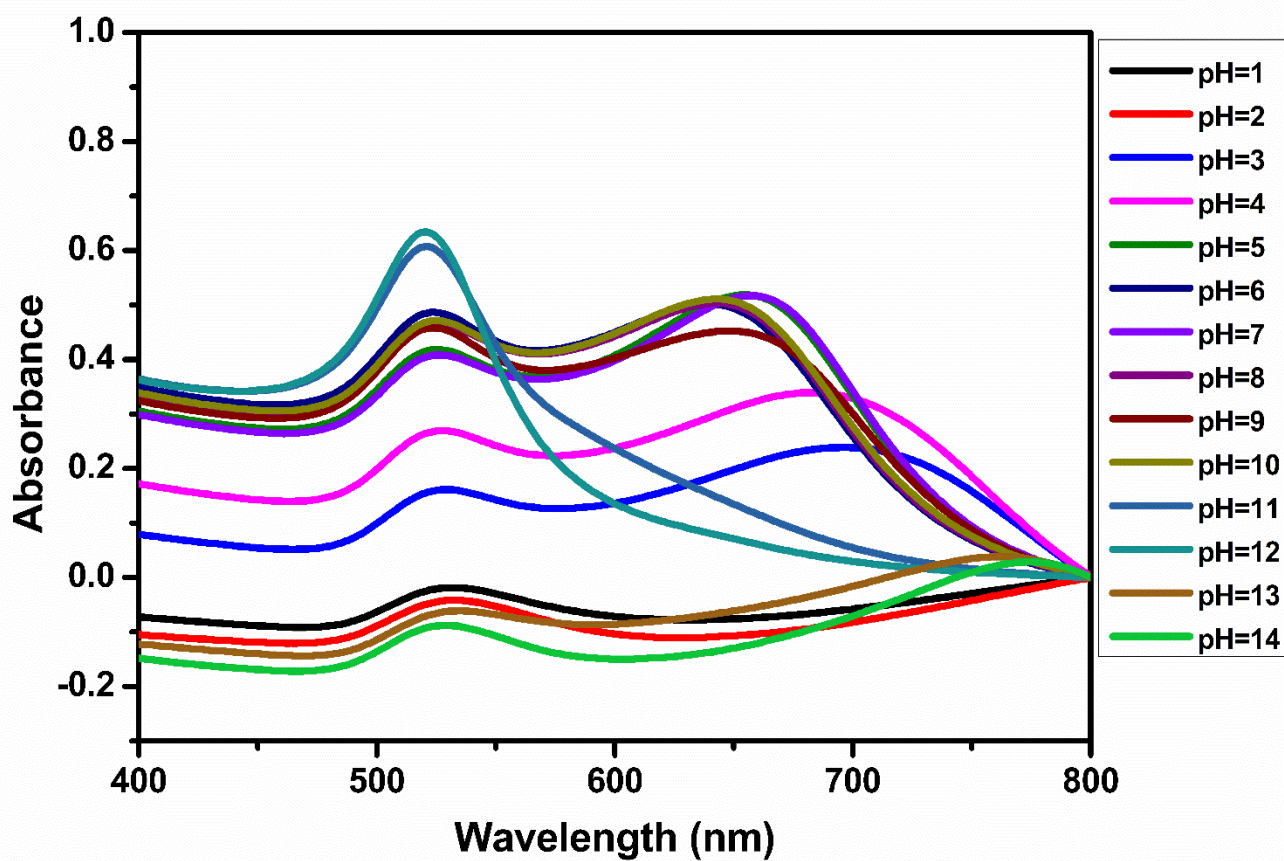

**Fig.S32:** pH Study: UV-Visible spectra of corresponding pH metric titration of GNPs after with Glutathione in the pH range (1-14)

**Fig.S33:** Tentative mechanistic pathway for GNPs synthesis;

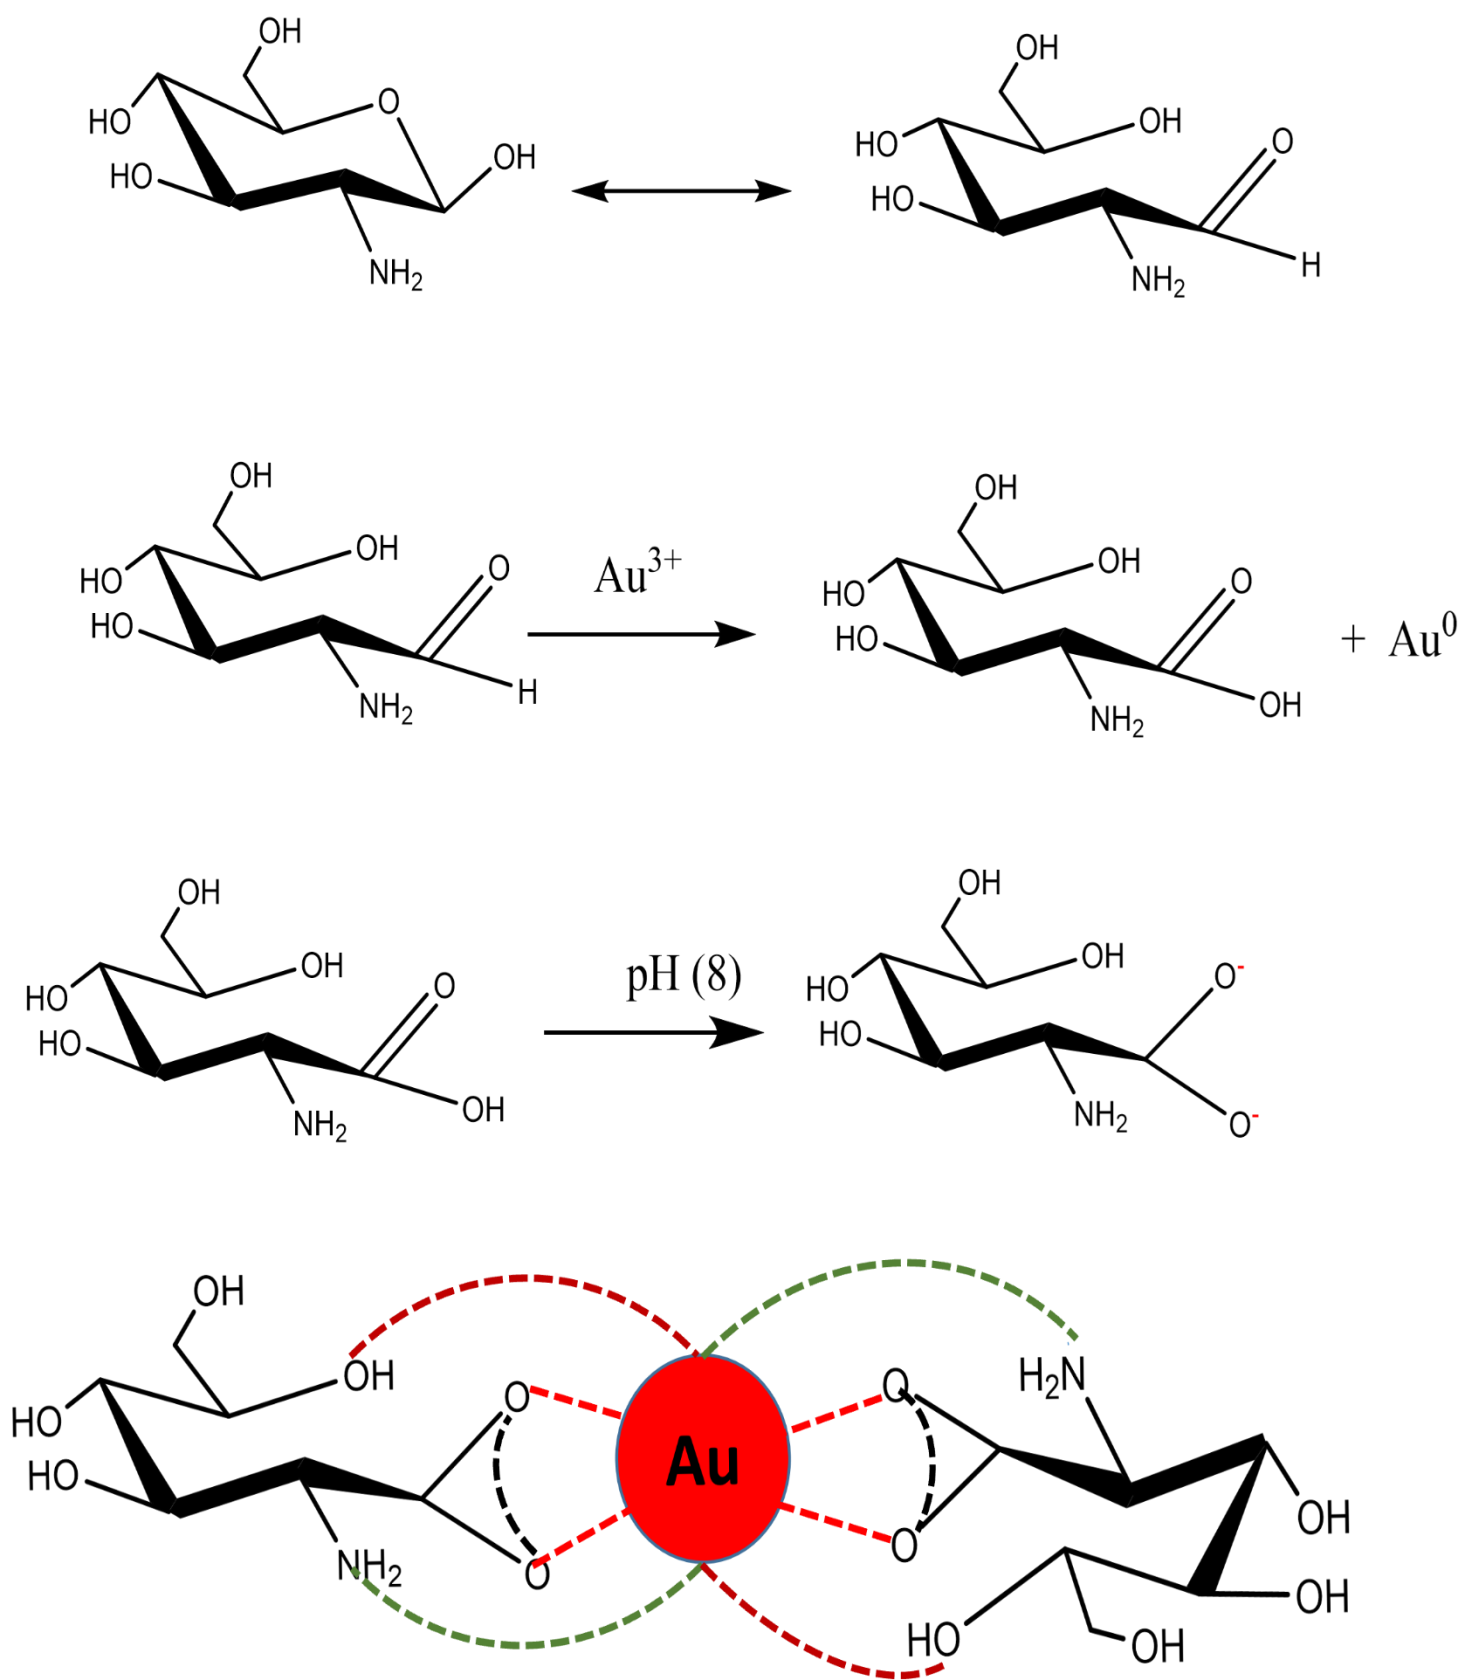

**Fig.S34: Mechanistic pathway for GNPs interaction with GSH**

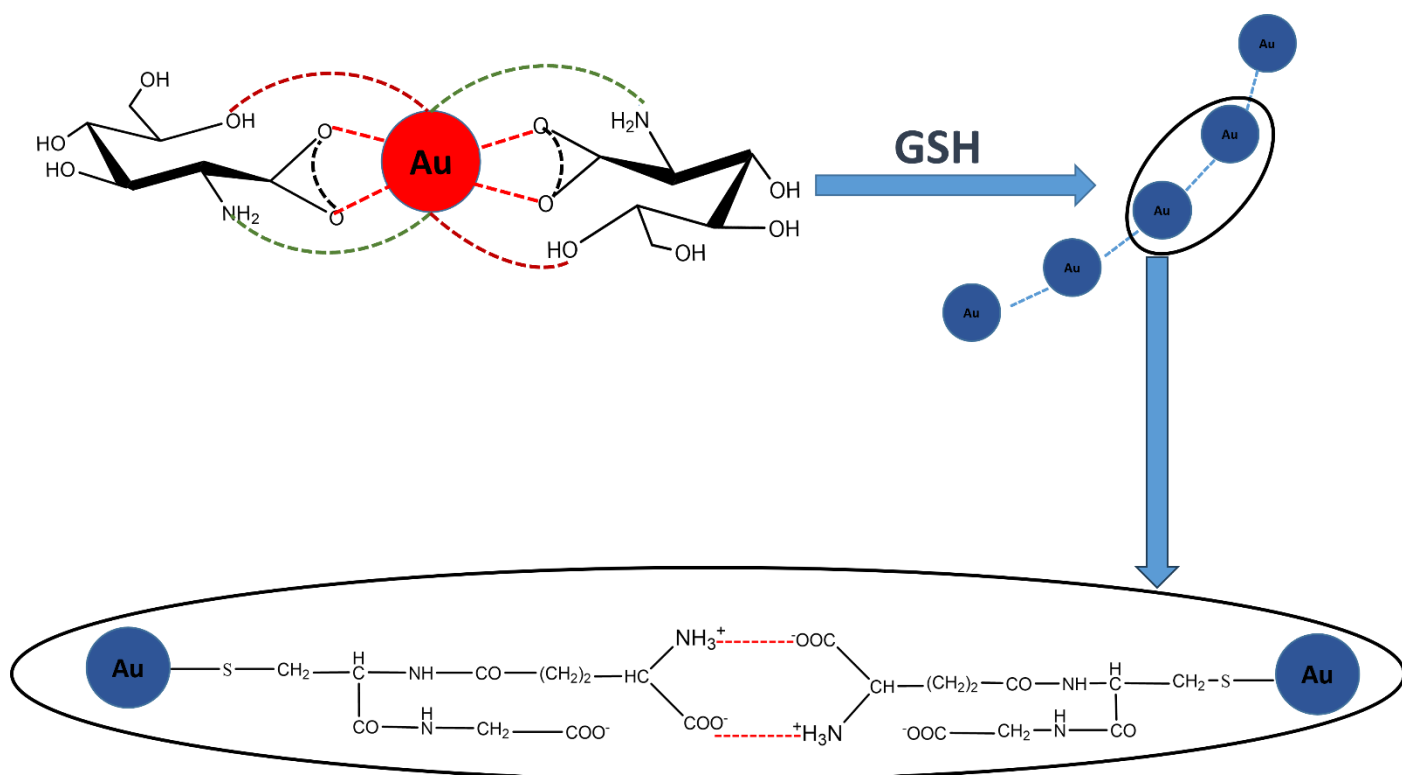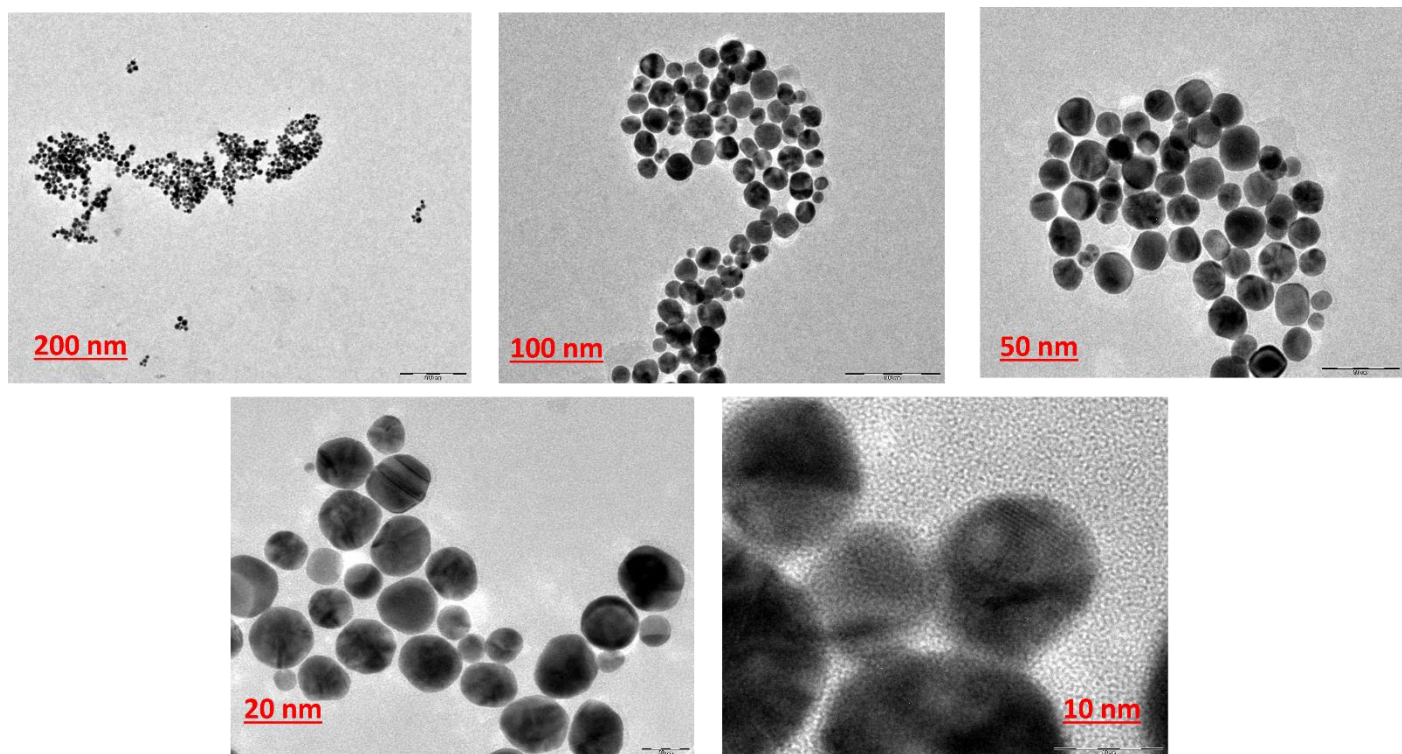

**Fig.S35: TEM image of GNPs (From low to high resolution)**



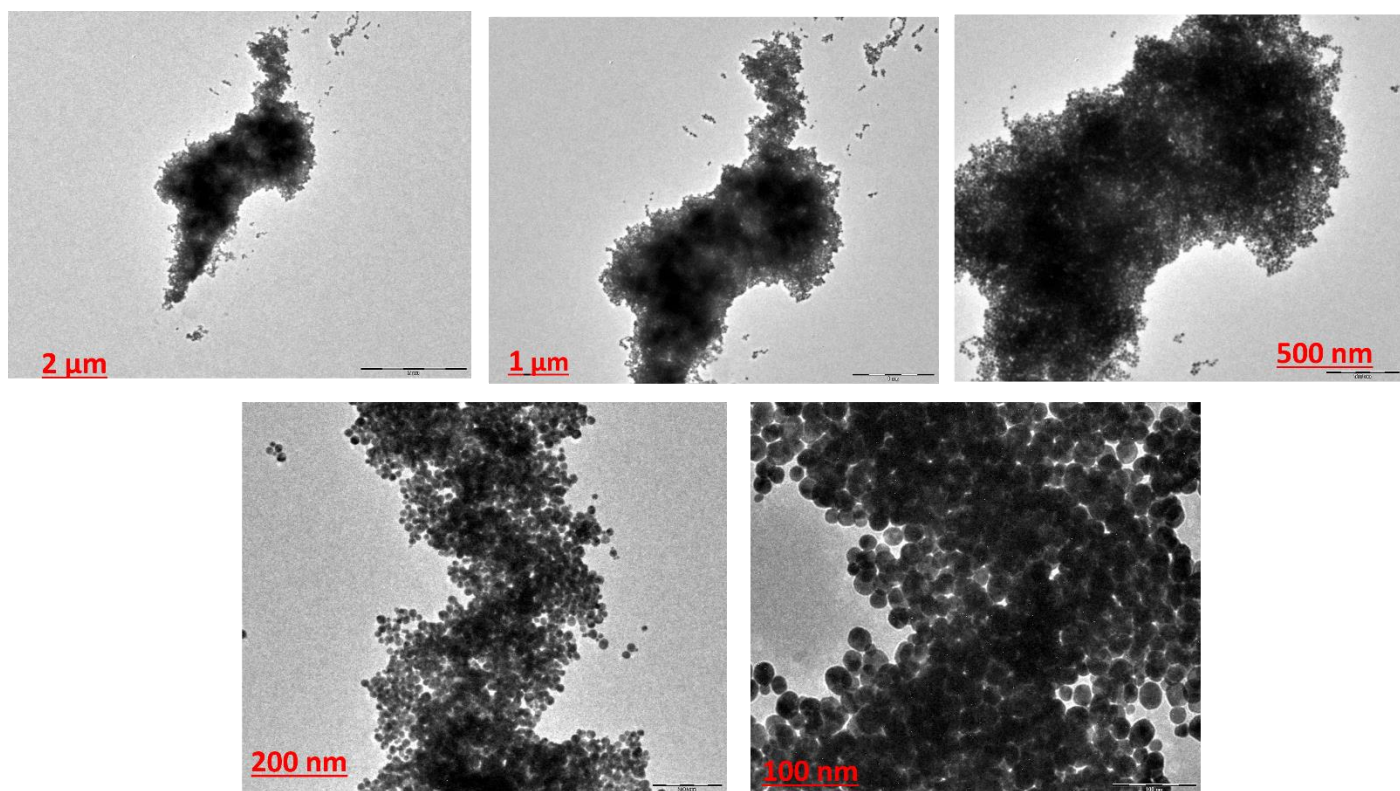

**Fig.S36: TEM image of GNPs with Glutathione (from low to high resolution)**

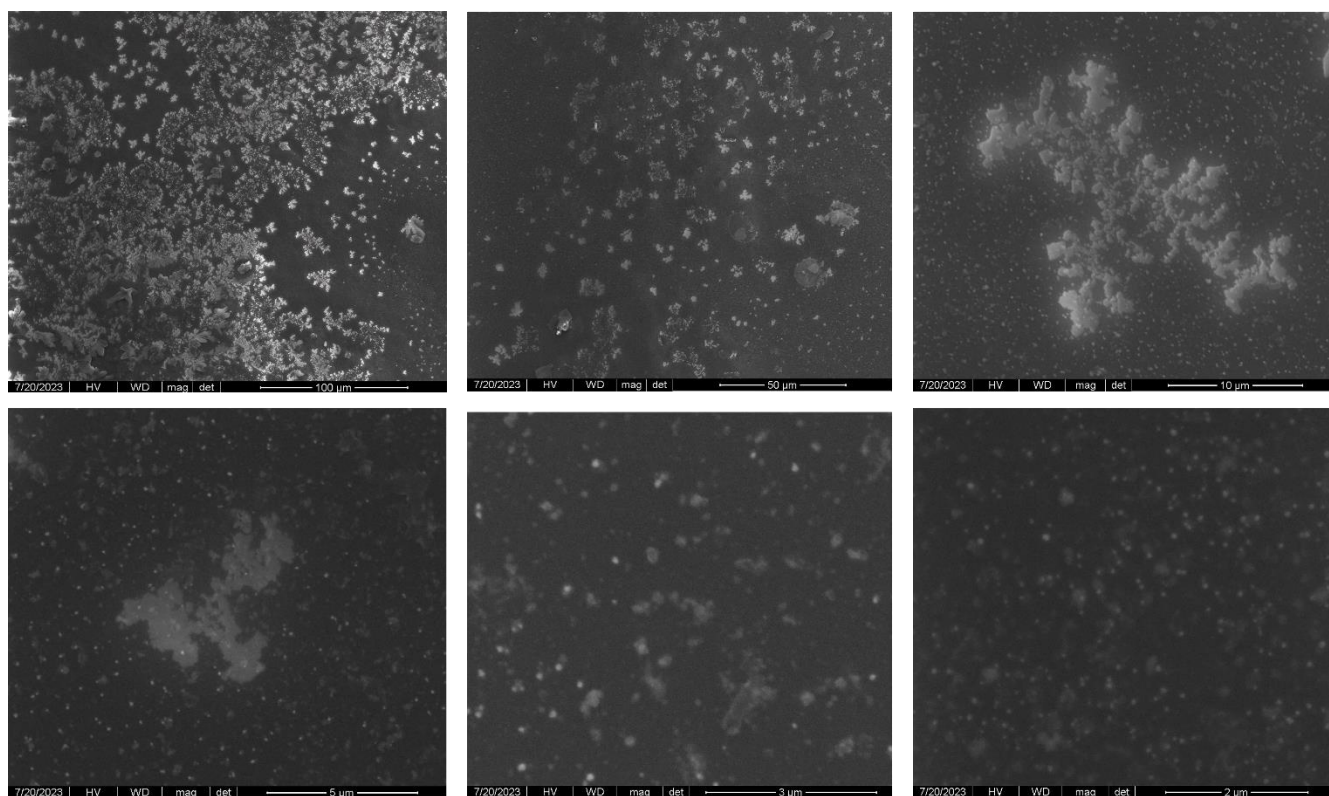

**Fig.S37: SEM image of GNPs (from low to high resolution)**

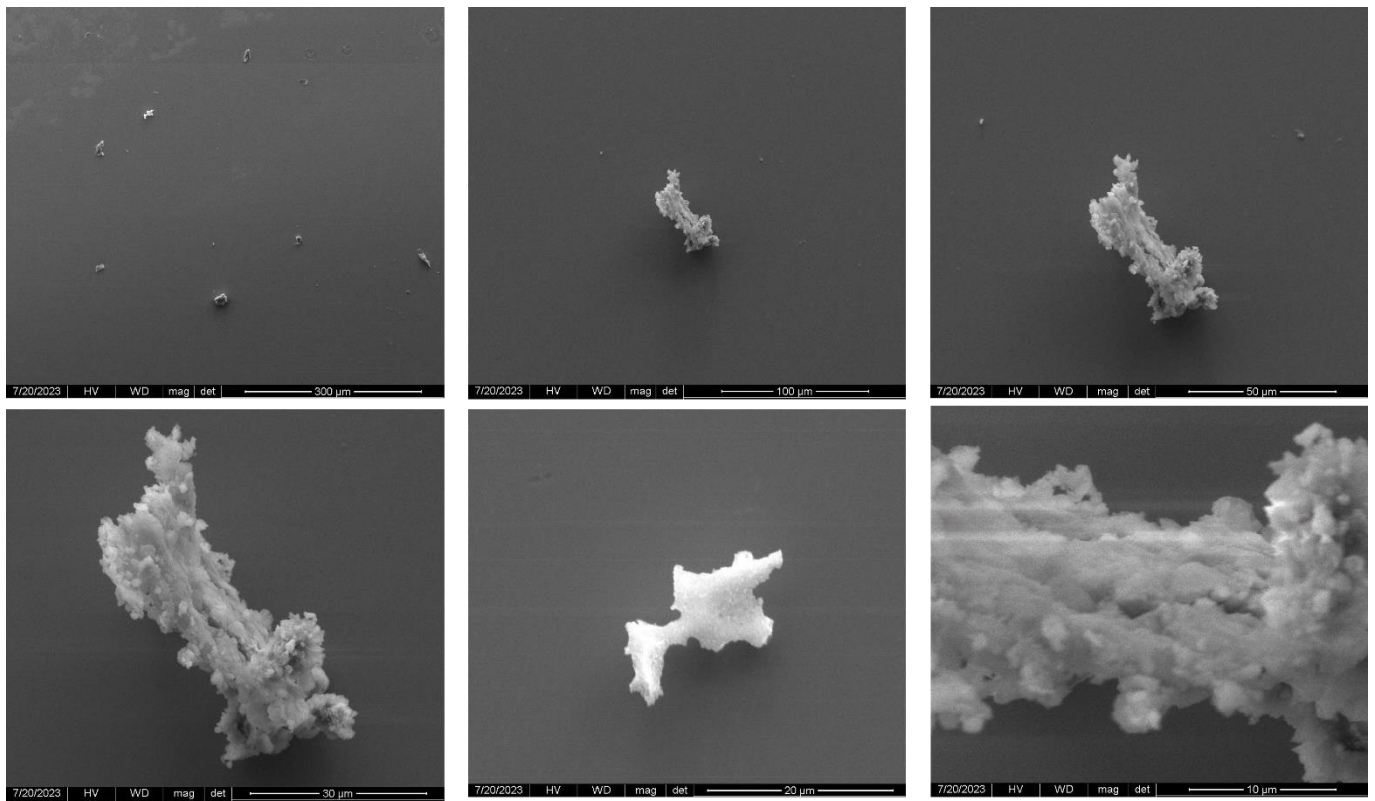

**Fig.S38: SEM image of GNPs with Glutathione (from low to high resolution)**

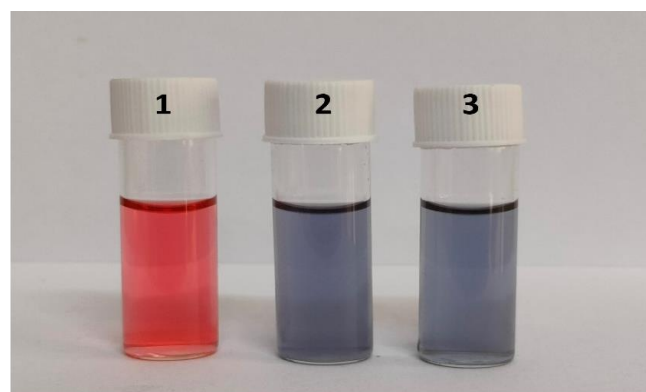

**(a)**

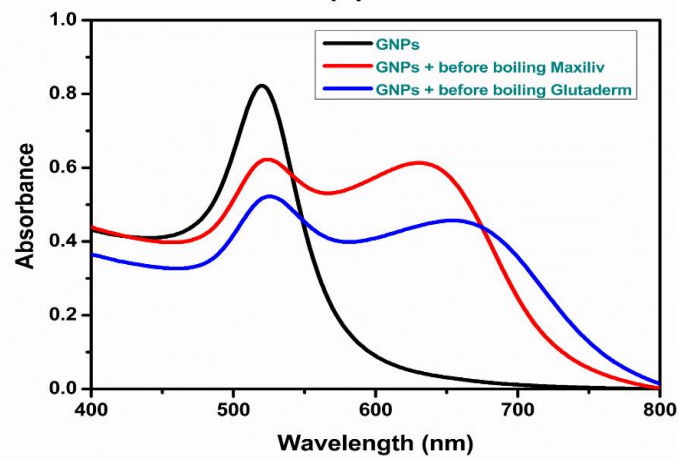

**(b)**

**Fig.S39: (a) Visual response of (1) GNPs (2) GNPs after addition of Maxiliv (without boiling) (3) GNPs after addition of Glutaderm (without boiling) (b) Corresponding UV-Visible spectra**

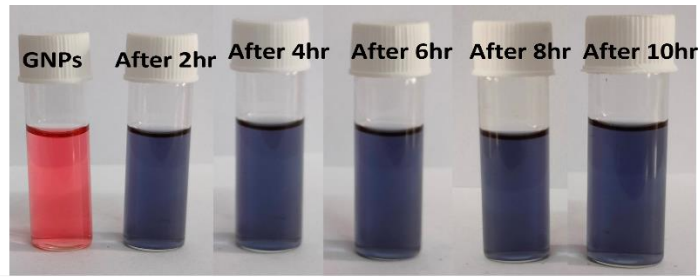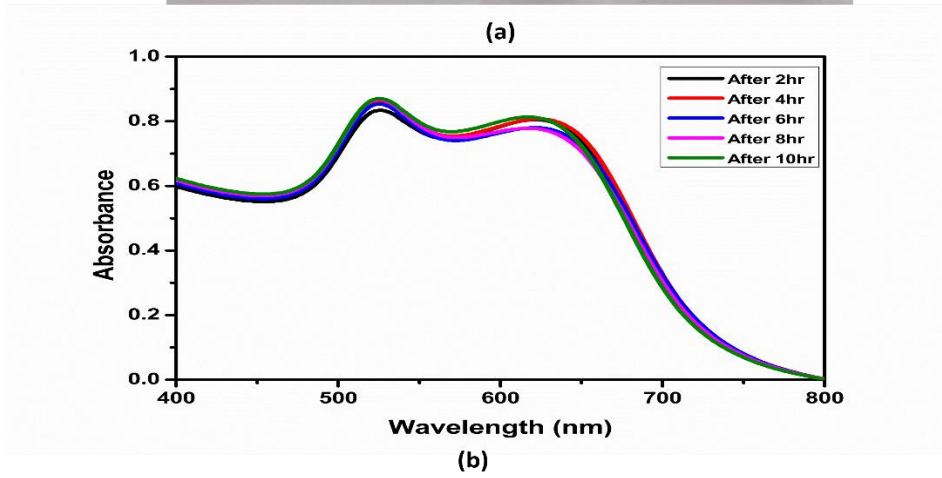

**Fig.S40:** (a) Visual response of GNPs after addition of Maxilliv at various time intervals (Intra-day repeatability) (b) Corresponding UV-Visible spectra

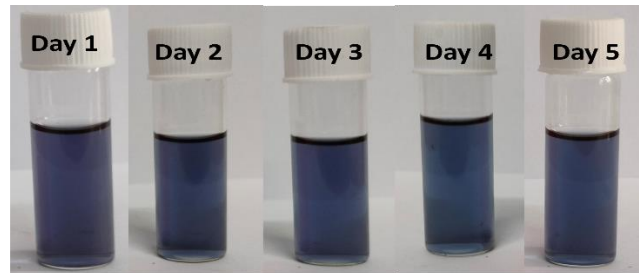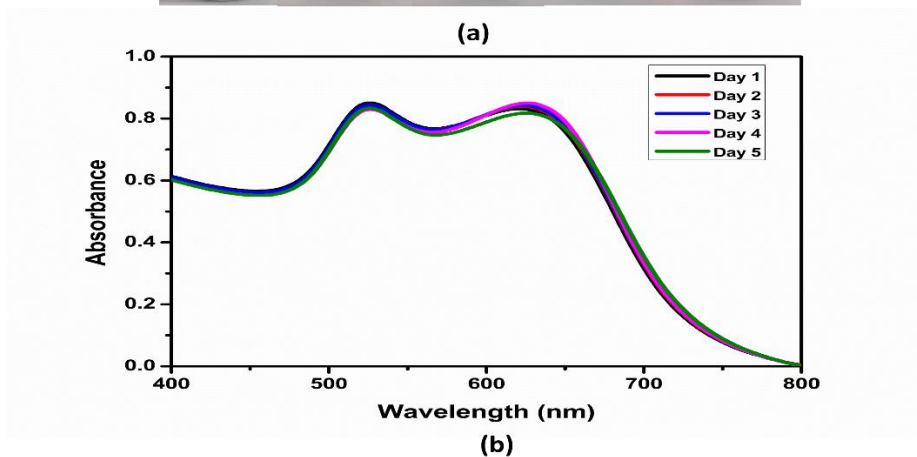

**Fig.S41:** (a) Visual response of GNPs after addition of Maxilliv over a course of five days intervals (Inter-day repeatability) (b) Corresponding UV-Visible spectra



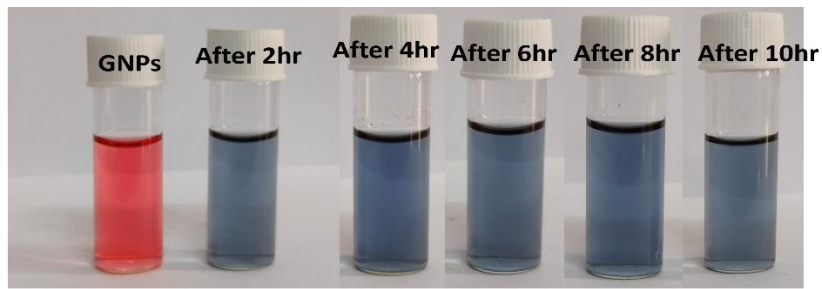

(a)

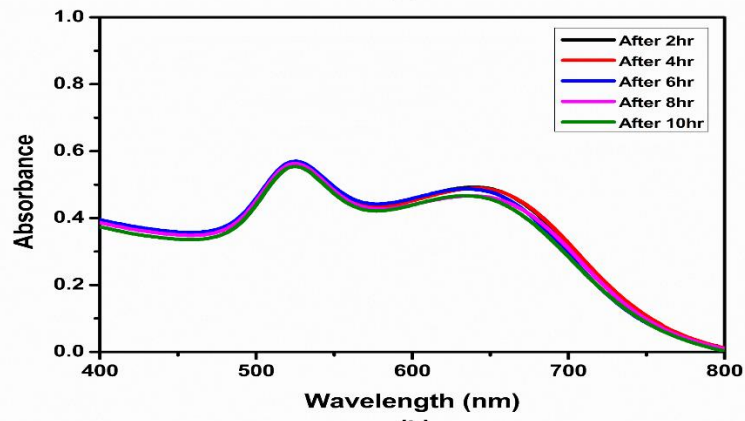

(b)

**Fig.S42:** (a) Visual response of GNPs after addition of Glutaderm at various time intervals (Intra-day repeatability) (b) Corresponding UV-Visible spectra

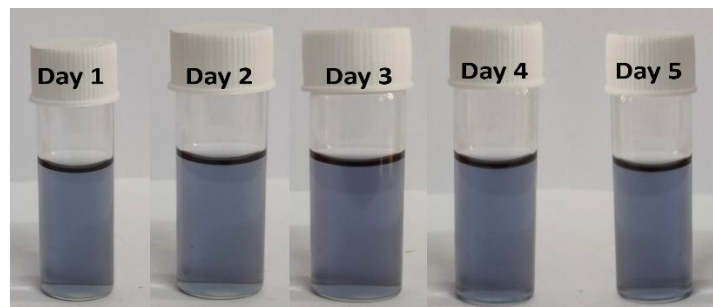

(a)

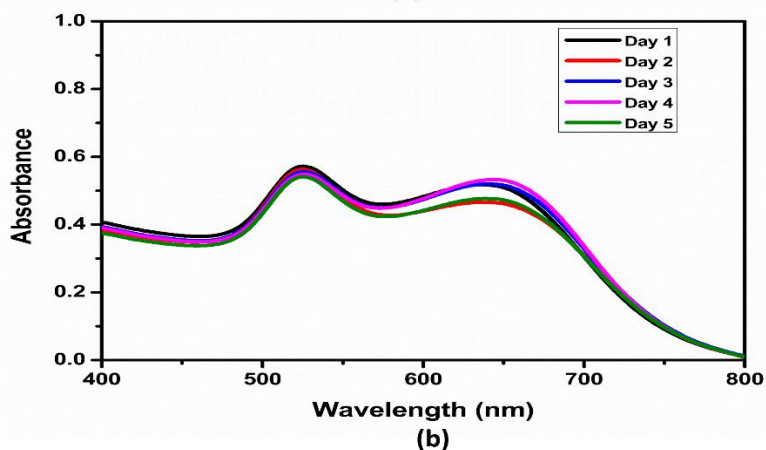

(b)

**Fig.S43:** (a) Visual response of GNPs after addition of Maxilliv over a course of five days (Inter day repeatability) (b) Corresponding UV-Visible spectra

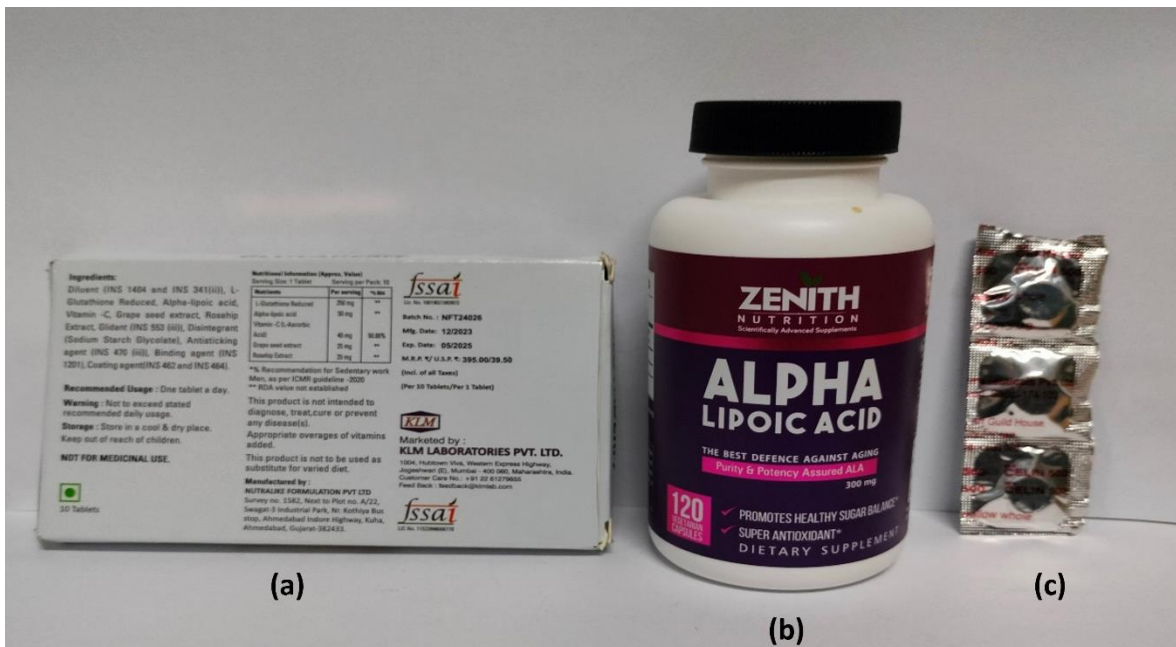

**Fig.S44:** (a) Image showing the amount of various constituents present in Glutaderm (b) Image showing Alpha lipoic acid used for selectivity study (c) Image showing Vitamin C used for selectivity study

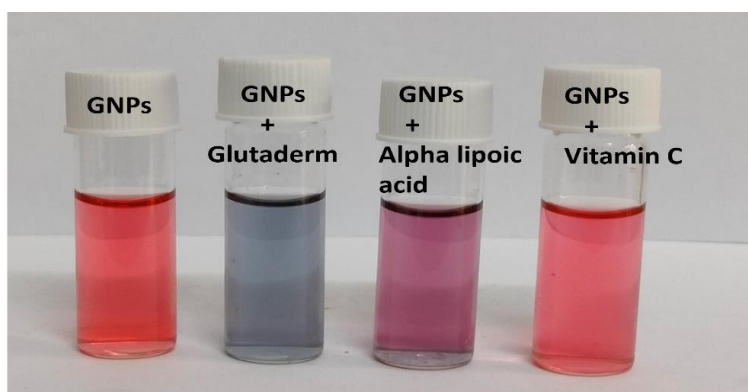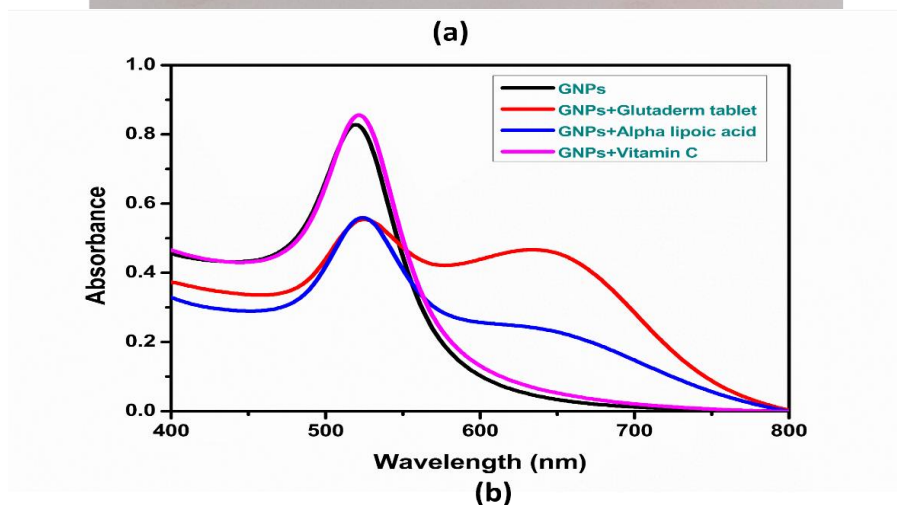

**Fig.S45:** (a) Visual response of GNP, GNP+Glutaderm, GNP+Alpha Lipoic acid, GNP+Vitamin C (b) Corresponding UV-Visible spectra

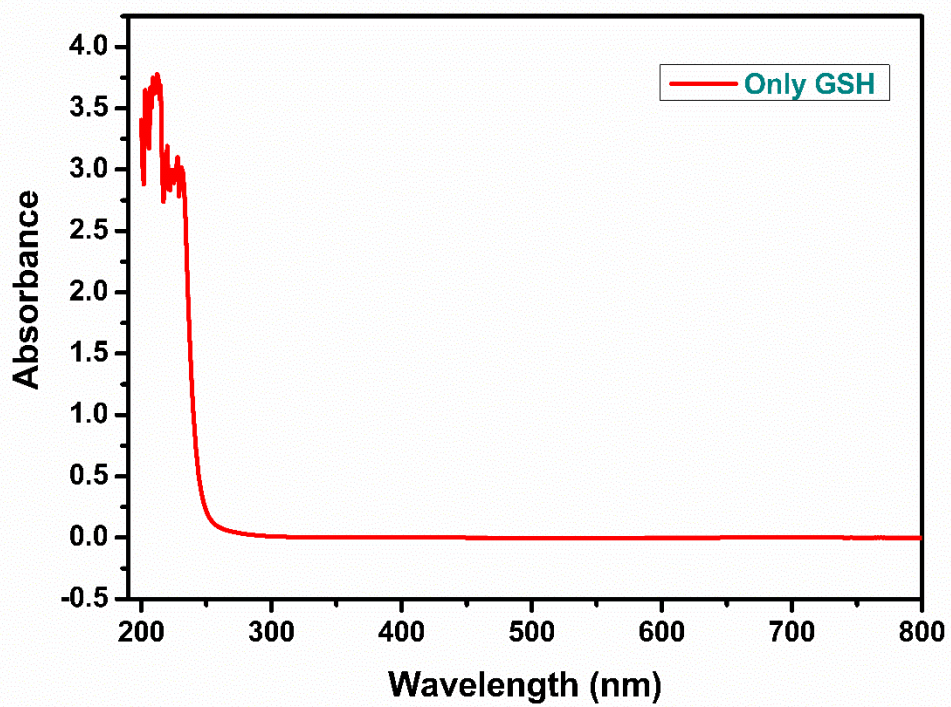

**Fig.S46:** UV-Visible spectrum of glutathione (GSH) in experimental conditions
